# Supplementary material for: Identification of potential inhibitors of 3‑Mercaptopyruvate Sulfurtransferase with a deep-learning based screening of natural products
Source: Research Square preprint supplement (doi:10.21203/rs.3.rs-8278911/v1), 2025-12-17
Supplement: Supplementary file 1 [file b616aff5f2a663f68daf5ec2.xlsx]

## Sheet: Sheet1
supplier_code	zinc_id	Rank	DiffDock_score	Pred_RMSD
1432057-74-3	ZINC000096023839	1	10	3.02
958296-13-4	ZINC000006603401	2	9.99815	2.08
84709-25-1	ZINC000257520722	3	9.9963	2.51
136997-69-8	ZINC001772820407	4	9.99444	2.74
76122-57-1	ZINC000000895660	5	9.99259	2.76
51020-87-2	ZINC000001587485	6	9.99074	2.01
160498-00-0	ZINC000261492347	7	9.98889	3.02
117479-87-5	ZINC000084652884	8	9.98703	2.19
PLACEHOLDER_1	ZINC00004098657	9	9.98518	2.74
1309079-08-0	ZINC001772820276	10	9.98333	3.64
1911-78-0	ZINC000038918836	11	9.98148	2.62
1782-65-6	ZINC000028536305	12	9.97962	1.95
37921-38-3	ZINC000004097841	13	9.97777	2.3
74805-92-8	ZINC000013481899	14	9.97592	1.62
1246012-24-7	ZINC001772820057	15	9.97407	2.1
36150-04-6	ZINC000086034491	16	9.97221	2.83
33627-41-7	ZINC000085636470	17	9.97036	2.04
4569-98-6	ZINC000013124366	18	9.96851	2.79
2034-69-7	ZINC000000689683	19	9.96666	2.21
20633-67-4	ZINC000070455477	20	9.96481	2.2
331954-16-6	ZINC000014819208	21	9.96295	2.28
21796-15-6	ZINC000005699918	22	9.9611	2.07
20013-76-7	ZINC000015153785	23	9.95925	2.35
78708-33-5	ZINC000257543460	24	9.9574	3
77949-42-9	ZINC001772820161	25	9.95554	1.67
73002-86-5	ZINC000257531454	26	9.95369	2.43
952473-86-8	ZINC000198415866	27	9.95184	2.54
151200-48-5	ZINC000095539270	28	9.94999	3.58
PLACEHOLDER_2	ZINC00000121541	29	9.94813	1.58
1206805-30-2	ZINC000139633638	30	9.94628	3.59
478-01-3	ZINC000001531669	31	9.94443	2.7
1114491-57-4	ZINC000014443028	32	9.94258	2.39
131559-54-1	ZINC000014823902	33	9.94073	3.18
PLACEHOLDER_3	ZINC0010015486	34	9.93887	1.89
190906-61-7	ZINC000049872145	35	9.93702	2.52
1114491-60-9	ZINC000014443032	36	9.93517	2.86
156398-61-7	ZINC000013309359	37	9.93332	2.27
38412-82-7	ZINC000014727929	38	9.93146	2.09
201534-09-0	ZINC000040420330	39	9.92961	3.11
103001-05-4	ZINC000013434355	40	9.92776	2.67
PLACEHOLDER_4	ZINC00001668768	41	9.92591	1.46
6619-95-0	ZINC000252485422	42	9.92405	3.37
14356-51-5	ZINC000033832838	43	9.9222	2.28
118169-27-0	ZINC000031156160	44	9.92035	2.39
67023-81-8	ZINC001077995401	45	9.9185	1.82
517885-72-2	ZINC000034228313	46	9.91664	2.49
477953-07-4	ZINC001077995428	47	9.91479	2.72
PLACEHOLDER_5	ZINC00085799038	48	9.91294	2.46
6587-37-7	ZINC000096023899	49	9.91109	2.3
1134138-66-1	ZINC000096903078	50	9.90924	2.83
17290-70-9	ZINC000014645298	51	9.90738	2.58
129280-34-8	ZINC000014727602	52	9.90553	2.28
30368-42-4	ZINC000000899787	53	9.90368	2.17
1443421-84-8	ZINC000205972582	54	9.90183	2
66568-97-6	ZINC000014806846	55	9.89997	2.38
929637-35-4	ZINC001772820093	56	9.89812	2.01
76-22-2	ZINC000000967521	57	9.89627	2.33
477565-36-9	ZINC000038296656	58	9.89442	2.68
29307-03-7	ZINC000016343427	59	9.89256	2.42
34818-83-2	ZINC000015206087	60	9.89071	2.54
98665-16-8	ZINC000038433350	61	9.88886	2.09
67023-80-7	ZINC000252483495	62	9.88701	1.54
25368-01-8	ZINC000014725351	63	9.88515	2
132294-77-0	ZINC000031542827	64	9.8833	3.72
97-59-6	ZINC000001843030	65	9.88145	2.79
57719-81-0	ZINC000197452689	66	9.8796	1.52
52096-50-1	ZINC000014692687	67	9.87775	2.47
862255-64-9	ZINC000261492887	68	9.87589	2.44
658062-23-8	ZINC000013381693	69	9.87404	2.39
79406-09-0	ZINC000238748848	70	9.87219	3.09
70206-70-1	ZINC000096023827	71	9.87034	3.32
126005-94-5	ZINC000031460001	72	9.86848	1.98
1357351-29-1	ZINC000247821436	73	9.86663	2.33
5928-26-7	ZINC000004096693	74	9.86478	2.56
485-35-8	ZINC000001599730	75	9.86293	2.77
39524-08-8	ZINC000584567038	76	9.86107	2.8
1356822-09-7	ZINC000082157710	77	9.85922	3.05
84-79-7	ZINC000003873071	78	9.85737	2.16
42895-58-9	ZINC000003882527	79	9.85552	3.33
64776-96-1	ZINC000031160548	80	9.85366	3.42
112966-16-2	ZINC000038231314	81	9.85181	2.76
552-57-8	ZINC000575416825	82	9.84996	1.56
195735-16-1	ZINC000247932847	83	9.84811	2.57
29505-31-5	ZINC001772820256	84	9.84626	2.51
65891-61-4	ZINC000140364094	85	9.8444	2.27
79907-44-1	ZINC000150528319	86	9.84255	2.57
552-57-8	ZINC000257345133	87	9.8407	2.25
604-99-9	ZINC000104892612	88	9.83885	2.1
127098-14-0	ZINC000085809059	89	9.83699	2.82
865-21-4	ZINC000085432544	90	9.83514	3.01
1616683-55-6	ZINC000299817502	91	9.83329	2.7
88182-33-6	ZINC000033830831	92	9.83144	2.74
125276-62-2	ZINC000031499954	93	9.82958	2.02
1916-07-0	ZINC000000057165	94	9.82773	2.69
101691-27-4	ZINC000014758993	95	9.82588	2.6
20316-62-5	ZINC000017654711	96	9.82403	1.6
103630-03-1	ZINC000249691100	97	9.82218	2.68
106894-43-3	ZINC000169748412	98	9.82032	2.22
70987-96-1	ZINC000014728347	99	9.81847	2.57
487-39-8	ZINC000005037520	100	9.81662	2.89
91653-75-7	ZINC000252490983	101	9.81477	2.04
1310146-00-9	ZINC000238760633	102	9.81291	2.54
6178-44-5	ZINC000001634150	103	9.81106	2.45
150258-84-7	ZINC000013340921	104	9.80921	2.51
6900-87-4	ZINC001772820242	105	9.80736	2.58
4481-62-3	ZINC000008762246	106	9.8055	2.4
119318-15-9	ZINC000087493089	107	9.80365	2.26
104380-15-6	ZINC000031156641	108	9.8018	2.15
1212148-58-7	ZINC000035464775	109	9.79995	2.27
78214-33-2	ZINC000072129809	110	9.79809	2.13
130395-54-9	ZINC001772820494	111	9.79624	3.34
482-68-8	ZINC000014691674	112	9.79439	3.2
200813-31-6	ZINC000257575453	113	9.79254	2.53
142566-61-8	ZINC000238779150	114	9.79069	2.27
5128-44-9	ZINC000005733551	115	9.78883	3.01
25739-41-7	ZINC000005732373	116	9.78698	2.7
904665-71-0	ZINC000138184744	117	9.78513	1.41
288248-46-4	ZINC000096023709	118	9.78328	2.19
59742-11-9	ZINC000096086279	119	9.78142	3.34
113558-15-9	ZINC000070455423	120	9.77957	2.38
41682-30-8	ZINC000095933355	121	9.77772	2.32
99624-39-2	ZINC000238757128	122	9.77587	2.49
84567-08-8	ZINC000256432203	123	9.77401	3.64
1156-78-1	ZINC000006525249	124	9.77216	3.38
956384-55-7	ZINC000936069309	125	9.77031	3.03
53800-21-8	ZINC000059779679	126	9.76846	2.72
64776-96-1	ZINC000037613946	127	9.7666	2.41
19891-85-1	ZINC000032062349	128	9.76475	2.74
95258-16-5	ZINC001772820431	129	9.7629	2.92
92466-31-4	ZINC000070454473	130	9.76105	2.5
131-03-3	ZINC000003977785	131	9.7592	2.26
144424-80-6	ZINC001772820065	132	9.75734	2.48
4646-86-0	ZINC000000899887	133	9.75549	1.82
174204-83-2	ZINC000013386279	134	9.75364	2.82
80396-57-2	ZINC001772820178	135	9.75179	3.25
137494-04-3	ZINC000013460029	136	9.74993	2.24
30536-48-2	ZINC000014517001	137	9.74808	2.98
14930-96-2	ZINC000253839016	138	9.74623	3.42
769140-74-1	ZINC000086051976	139	9.74438	2.11
4931-66-2	ZINC000003588957	140	9.74252	2.75
213905-35-2	ZINC000014616231	141	9.74067	2.42
1351931-30-0	ZINC000101151211	142	9.73882	1.95
83924-98-5	ZINC000000899129	143	9.73697	3.58
86989-18-6	ZINC000095933394	144	9.73512	3.08
1418150-06-7	ZINC001772820261	145	9.73326	2.46
349534-70-9	ZINC000085659710	146	9.73141	2.8
142566-61-8	ZINC000238732414	147	9.72956	2.55
86654-26-4	ZINC000014489236	148	9.72771	2.45
531-59-9	ZINC000000391177	149	9.72585	2.77
161068-53-7	ZINC000014727566	150	9.724	2.76
10597-60-1	ZINC000002379217	151	9.72215	1.92
90332-64-2	ZINC000261493027	152	9.7203	1.72
1414883-82-1	ZINC001772820061	153	9.71844	2.22
88206-46-6	ZINC000029056300	154	9.71659	2.1
88664-09-9	ZINC000014774001	155	9.71474	2.4
644967-44-2	ZINC000014814165	156	9.71289	2.27
890928-81-1	ZINC000098214467	157	9.71103	2.48
34168-56-4	ZINC000005158854	158	9.70918	2.63
52358-58-4	ZINC000015203584	159	9.70733	2.86
124960-89-0	ZINC000261492895	160	9.70548	2.23
20133-19-1	ZINC000034173918	161	9.70363	2.03
20133-19-1	ZINC000034173920	162	9.70177	1.9
55136-76-0	ZINC000255231340	163	9.69992	1.38
22031-64-7	ZINC000001665286	164	9.69807	2.97
6730-83-2	ZINC000004102257	165	9.69622	2.6
2055882-21-6	ZINC001772820222	166	9.69436	2.2
465-74-7	ZINC000038661069	167	9.69251	3.24
903-67-3	ZINC000006030285	168	9.69066	2.44
465-39-4	ZINC000004212221	169	9.68881	2.74
1111897-60-9	ZINC000077031588	170	9.68695	1.96
57701-86-7	ZINC001077997764	171	9.6851	2.63
478158-77-9	ZINC000014780951	172	9.68325	3.12
569-92-6	ZINC000005998754	173	9.6814	2.95
101236-50-4	ZINC000033832203	174	9.67954	2.2
112137-81-2	ZINC000084670401	175	9.67769	1.88
510-30-5	ZINC000004097828	176	9.67584	2
87562-76-3	ZINC000038322012	177	9.67399	2.52
6018-40-2	ZINC000029746996	178	9.67214	3.29
98665-66-8	ZINC001772820192	179	9.67028	2.31
84573-16-0	ZINC000005664046	180	9.66843	2.3
50298-90-3	ZINC000028760054	181	9.66658	1.94
69804-59-7	ZINC000013481667	182	9.66473	2.45
23095-44-5	ZINC000001615142	183	9.66287	1.87
168293-10-5	ZINC000013340360	184	9.66102	3
94805-83-1	ZINC000013130924	185	9.65917	2.87
34292-87-0	ZINC000085867362	186	9.65732	2.69
1246012-25-8	ZINC001772820077	187	9.65546	1.98
14937-32-7	ZINC000169292785	188	9.65361	2.32
72021-23-9	ZINC000067902744	189	9.65176	2.73
109194-60-7	ZINC000049051501	190	9.64991	2.83
15291-76-6	ZINC000253387842	191	9.64806	2.72
83725-24-0	ZINC000169318983	192	9.6462	2.14
185414-25-9	ZINC000238742443	193	9.64435	1.8
769140-74-1	ZINC000038855405	194	9.6425	2.16
221150-18-1	ZINC000085996821	195	9.64065	3.5
1891097-17-8	ZINC001083777536	196	9.63879	2.46
70872-29-6	ZINC000003637160	197	9.63694	1.52
39729-21-0	ZINC000252497241	198	9.63509	2.66
865187-17-3	ZINC001077996414	199	9.63324	3.45
5282-14-4	ZINC000221506219	200	9.63138	2.79
155418-97-6	ZINC000013333972	201	9.62953	2.85
176665-78-4	ZINC000033830865	202	9.62768	3.09
17678-76-1	ZINC000013480424	203	9.62583	2.8
631-01-6	ZINC000004097834	204	9.62397	2.21
136082-41-2	ZINC000038426330	205	9.62212	1.8
114567-47-4	ZINC000032023197	206	9.62027	2.52
6736-85-2	ZINC000306120830	207	9.61842	2.64
53-16-7	ZINC000013509425	208	9.61657	2.77
62499-71-2	ZINC000013480170	209	9.61471	2.47
53800-21-8	ZINC000059779681	210	9.61286	1.81
159650-12-1	ZINC000014691670	211	9.61101	3.2
36151-01-6	ZINC000013331158	212	9.60916	1.7
23720-80-1	ZINC000070454234	213	9.6073	1.32
82003-90-5	ZINC000003933037	214	9.60545	1.73
6926-14-3	ZINC000008952339	215	9.6036	2.11
52286-74-5	ZINC000238808751	216	9.60175	2.4
220328-03-0	ZINC000257408616	217	9.59989	3.13
219916-77-5	ZINC001772820292	218	9.59804	2.3
72458-85-6	ZINC000014721540	219	9.59619	2.63
1038753-13-7	ZINC000138190632	220	9.59434	3.28
69804-59-7	ZINC000013481668	221	9.59248	2.24
333798-10-0	ZINC000006520505	222	9.59063	2.45
213552-47-7	ZINC000096023897	223	9.58878	2.36
54695-80-6	ZINC000031165169	224	9.58693	3.23
23141-25-5	ZINC000028541549	225	9.58508	2.73
93395-31-4	ZINC000255286913	226	9.58322	2.18
57498-69-8	ZINC000059737294	227	9.58137	1.82
33116-33-5	ZINC000256371643	228	9.57952	2.77
465-16-7	ZINC000008214621	229	9.57767	2.02
53734-75-1	ZINC000014613164	230	9.57581	2.53
6610-56-6	ZINC001772820097	231	9.57396	3.26
776-86-3	ZINC000001845692	232	9.57211	3
221150-19-2	ZINC000013311968	233	9.57026	3.53
24274-48-4	ZINC000005844406	234	9.5684	2.37
22804-49-5	ZINC000014764110	235	9.56655	2.36
231280-71-0	ZINC000095558566	236	9.5647	2.65
64190-94-9	ZINC000015216874	237	9.56285	2.57
84745-94-8	ZINC000005662895	238	9.56099	2.84
22144-77-0	ZINC000253679227	239	9.55914	2.22
21586-90-3	ZINC000101188294	240	9.55729	2.51
123316-64-3	ZINC000014726235	241	9.55544	3.25
79439-84-2	ZINC001772820471	242	9.55359	2.39
27215-14-1	ZINC000021992902	243	9.55173	1.97
294856-66-9	ZINC000028882432	244	9.54988	2.1
135384-00-8	ZINC000015115144	245	9.54803	2.49
133005-15-9	ZINC000238737553	246	9.54618	2.01
6792-07-0	ZINC001077996678	247	9.54432	1.86
5273-85-8	ZINC000001747260	248	9.54247	2.91
174204-83-2	ZINC000013386282	249	9.54062	1.93
24513-57-3	ZINC000033830999	250	9.53877	2.74
6871-44-9	ZINC000252478202	251	9.53691	2.52
109471-13-8	ZINC000106886788	252	9.53506	2.38
172486-22-5	ZINC000070454698	253	9.53321	2.61
74284-42-7	ZINC000257770531	254	9.53136	1.05
73-31-4	ZINC000000057060	255	9.52951	2.48
7154-01-0	ZINC000000402228	256	9.52765	2.79
22805-15-8	ZINC000077031686	257	9.5258	2.49
63596-61-2	ZINC001772820420	258	9.52395	1.95
58493-71-3	ZINC000096023683	259	9.5221	2.81
115610-31-6	ZINC000034237066	260	9.52024	2.26
376361-97-6	ZINC000013341105	261	9.51839	2.01
64998-19-2	ZINC001078028182	262	9.51654	2.47
102518-79-6	ZINC000009411213	263	9.51469	3.02
133740-25-7	ZINC000049774940	264	9.51283	1.85
144049-72-9	ZINC001077995391	265	9.51098	2.36
147-85-3	ZINC000000895360	266	9.50913	3.4
39024-12-9	ZINC000096023763	267	9.50728	2.34
16844-71-6	ZINC000006067010	268	9.50542	3.05
124858-37-3	ZINC000137376946	269	9.50357	2.39
491-74-7	ZINC000003978463	270	9.50172	2.32
53452-34-9	ZINC001772820090	271	9.49987	2.68
1312716-25-8	ZINC000139807989	272	9.49802	2.24
99624-27-8	ZINC000005854490	273	9.49616	2.66
26194-57-0	ZINC000014435203	274	9.49431	2.94
1801750-22-0	ZINC001772820417	275	9.49246	3.01
5096-70-8	ZINC000000895617	276	9.49061	2.17
6426-44-4	ZINC000002126370	277	9.48875	4.46
845959-98-0	ZINC000140932781	278	9.4869	2.6
129488-34-2	ZINC000108646259	279	9.48505	2.94
263249-77-0	ZINC000014649779	280	9.4832	2.68
53846-50-7	ZINC000000039452	281	9.48134	1.71
74560-05-7	ZINC000002565773	282	9.47949	2.55
63644-71-3	ZINC000033832528	283	9.47764	2.84
92609-77-3	ZINC000015217369	284	9.47579	2.29
13895-92-6	ZINC000014689152	285	9.47393	2.58
25514-29-8	ZINC000027523120	286	9.47208	2.44
1522004-70-1	ZINC000208937906	287	9.47023	3.1
30828-09-2	ZINC000035465466	288	9.46838	2.55
775351-88-7	ZINC000015120527	289	9.46653	2.89
16408-75-6	ZINC000013384002	290	9.46467	1.86
1372527-25-7	ZINC000084709282	291	9.46282	2.86
1309920-99-7	ZINC000238759827	292	9.46097	2.92
19309-14-9	ZINC000004716487	293	9.45912	2.54
123621-00-1	ZINC001077995388	294	9.45726	3.31
28325-56-6	ZINC001077996751	295	9.45541	2.54
107585-75-1	ZINC000006041766	296	9.45356	3.27
511-89-7	ZINC001772820139	297	9.45171	1.85
408324-76-5	ZINC000013378188	299	9.448	2.52
1286694-67-4	ZINC000085636476	300	9.44615	2.54
86362-16-5	ZINC001077996814	301	9.4443	2.31
22136-74-9	ZINC000043552595	302	9.44245	2.89
195723-38-7	ZINC000248032978	303	9.44059	2.35
107160-24-7	ZINC001077995393	304	9.43874	1.72
117-81-7	ZINC000003860433	305	9.43689	2.91
143120-46-1	ZINC001772820033	306	9.43504	2.41
69768-97-4	ZINC000006018567	307	9.43318	2.33
22226-73-9	ZINC000161527600	308	9.43133	1.99
769928-72-5	ZINC001077995417	309	9.42948	1.91
58316-41-9	ZINC000245224451	310	9.42763	2.43
1922129-42-7	ZINC001772591088	311	9.42577	2.47
1020074-97-8	ZINC001772820140	312	9.42392	2.27
474-07-7	ZINC000000899553	313	9.42207	1.72
596799-30-3	ZINC001077995386	314	9.42022	2.13
63807-85-2	ZINC000059728627	315	9.41836	2.06
115452-09-0	ZINC000085529959	316	9.41651	2.93
149-32-6	ZINC000017971067	317	9.41466	2.79
60008-01-7	ZINC000006068297	318	9.41281	2.67
1238116-48-7	ZINC000049181795	319	9.41096	2.48
483-91-0	ZINC000033831993	320	9.4091	2.63
262272-76-4	ZINC000250754264	321	9.40725	1.83
110187-11-6	ZINC000014763060	322	9.4054	2.64
19685-09-7	ZINC000003979155	323	9.40355	2.11
23800-56-8	ZINC000013437345	324	9.40169	2.51
5876-17-5	ZINC000005998737	325	9.39984	2.51
5950-12-09	ZINC000001714282	326	9.39799	3.48
958885-86-4	ZINC000035031806	327	9.39614	2.24
466-09-1	ZINC000004073972	328	9.39428	2.27
74048-71-8	ZINC000085995150	329	9.39243	2.92
81678-46-8	ZINC000096023808	330	9.39058	1.73
138965-89-6	ZINC000096023739	331	9.38873	2.65
37687-34-6	ZINC000000900910	332	9.38687	2.75
6713-27-5	ZINC000008829452	333	9.38502	2.55
1334309-44-2	ZINC000070454679	334	9.38317	2.29
24144-61-4	ZINC000001708423	335	9.38132	2.1
1181224-13-4	ZINC000064513898	336	9.37947	2.77
20702-77-6	ZINC000004175639	337	9.37761	2.32
53947-89-0	ZINC000059588219	338	9.37576	2.07
23513-15-7	ZINC000043009609	339	9.37391	1.96
184587-72-2	ZINC000013382498	340	9.37206	3.18
385384-24-7	ZINC000139314632	341	9.3702	2.94
1190225-48-9	ZINC001077995445	342	9.36835	2.09
77658-45-8	ZINC000261492074	343	9.3665	1.86
911004-72-3	ZINC000015205928	344	9.36465	3.56
21401-21-8	ZINC000004095731	345	9.36279	2.75
126640-98-0	ZINC001077996764	346	9.36094	2.38
1189801-51-1	ZINC000100060215	347	9.35909	2.49
222629-77-8	ZINC000085733018	348	9.35724	2.02
54422-49-0	ZINC001772820468	349	9.35539	2.35
1432064-69-1	ZINC000096023849	350	9.35353	3.03
545-46-0	ZINC000003978797	351	9.35168	3.81
1351617-73-6	ZINC000255228699	352	9.34983	2.85
180164-14-1	ZINC001077996507	353	9.34798	1.68
21499-24-1	ZINC000013309247	354	9.34612	2.7
577976-26-2	ZINC000087493010	355	9.34427	2.37
41347-49-3	ZINC000013360786	356	9.34242	2.49
71610-00-9	ZINC000094303206	357	9.34057	2.44
529-59-9	ZINC000004097913	358	9.33871	3.12
187110-72-1	ZINC000013482924	359	9.33686	3.12
102036-28-2	ZINC000006093689	360	9.33501	3.03
130-95-0	ZINC000003831404	361	9.33316	2.27
488-76-6	ZINC000100055342	362	9.3313	2.5
21040-45-9	ZINC000001677782	363	9.32945	3.58
82958-44-9	ZINC000072176874	364	9.3276	2.33
66756-57-8	ZINC000196741095	365	9.32575	3.11
90921-13-4	ZINC000095911393	366	9.3239	2.09
465-13-4	ZINC001077995435	367	9.32204	2.86
1351931-30-0	ZINC000101151209	368	9.32019	2.37
221150-19-2	ZINC000013311970	369	9.31834	3.1
1126-61-0	ZINC000000586482	370	9.31649	2.03
5282-14-4	ZINC000087528413	371	9.31463	2.67
27856-54-8	ZINC000004102138	372	9.31278	1.58
63910-76-9	ZINC000072320239	373	9.31093	2.65
108124-75-0	ZINC000087493006	374	9.30908	2.76
122965-41-7	ZINC000583646008	375	9.30722	3.03
2255-50-7	ZINC000000518097	376	9.30537	3.11
17934-59-7	ZINC000169621652	377	9.30352	2.18
83-67-0	ZINC000000002151	378	9.30167	2.02
39763-33-2	ZINC000000057359	379	9.29981	2.65
260393-05-3	ZINC000096023711	380	9.29796	3.09
1581248-32-9	ZINC001077991870	381	9.29611	2.6
1392210-81-9	ZINC000096023917	382	9.29426	2.11
108-46-3	ZINC000000002028	383	9.29241	2.16
1251830-57-5	ZINC000064528088	384	9.29055	4.04
219649-95-3	ZINC000085814832	385	9.2887	2.28
480-43-3	ZINC000002146973	386	9.28685	1.96
53662-98-9	ZINC000257779632	387	9.285	2.78
29424-96-2	ZINC000002030112	388	9.28314	2.34
1269839-24-8	ZINC000072184053	389	9.28129	2.17
173294-74-1	ZINC000038910211	390	9.27944	3.05
952485-00-6	ZINC000096023918	391	9.27759	2.42
81489-69-2	ZINC001772820246	392	9.27573	3.66
390362-51-3	ZINC000096023611	393	9.27388	3.1
20245-39-0	ZINC000014819752	394	9.27203	1.22
28619-41-2	ZINC000038876020	395	9.27018	2.19
30045-16-0	ZINC000000597214	396	9.26832	2.57
474893-07-7	ZINC000247949884	397	9.26647	2.05
99340-07-5	ZINC000004098815	398	9.26462	2.64
1260173-73-6	ZINC001772820103	399	9.26277	2.06
129393-21-1	ZINC000238773829	400	9.26092	2.64
34340-51-7	ZINC000043552589	401	9.25906	1.61
770721-33-0	ZINC000038139690	402	9.25721	1.67
6711-69-9	ZINC000034154543	403	9.25536	2.96
60547-63-9	ZINC000261492105	404	9.25351	2.91
83150-97-4	ZINC001772820283	405	9.25165	3.48
117456-87-8	ZINC000039137780	406	9.2498	2.42
2679-65-4	ZINC000014640373	407	9.24795	2.76
87355-32-6	ZINC000261492921	408	9.2461	2.83
24694-80-2	ZINC000936069300	409	9.24424	3.53
802909-72-4	ZINC000014767663	410	9.24239	1.42
17934-59-7	ZINC001772820412	411	9.24054	1.84
524-12-9	ZINC000006483512	412	9.23869	3.23
18069-14-2	ZINC000004097821	413	9.23684	2.78
6702-55-2	ZINC000014822042	414	9.23498	3.49
299159-90-3	ZINC000013334615	415	9.23313	2.95
73435-47-9	ZINC000070450992	416	9.23128	1.63
128-57-4	ZINC000169296903	417	9.22943	2.69
59-67-6	ZINC000000001795	418	9.22757	3.17
6216-82-6	ZINC000005998959	419	9.22572	2.7
151649-34-2	ZINC000014648320	420	9.22387	2.59
72944-06-0	ZINC000040412528	421	9.22202	2.75
83015-88-7	ZINC000032180517	422	9.22016	1.92
63399-38-2	ZINC000033831113	423	9.21831	2.14
115-53-7	ZINC000001280591	424	9.21646	1.9
1053189-53-9	ZINC000096923938	425	9.21461	2.53
162290-05-3	ZINC000014806025	426	9.21275	2.41
91-64-5	ZINC000000074709	427	9.2109	1.85
26575-95-1	ZINC000026828734	428	9.20905	2.92
911004-72-3	ZINC000015205931	429	9.2072	3.17
480-23-9	ZINC000006092209	430	9.20535	2.16
1623437-86-4	ZINC000238787328	431	9.20349	1.71
143120-46-1	ZINC001772820034	432	9.20164	2.28
68353-24-2	ZINC000067903300	433	9.19979	3.1
68799-41-7	ZINC000013305612	434	9.19794	2.59
7716-14-5	ZINC001772820278	435	9.19608	1.97
769140-74-1	ZINC000087492973	436	9.19423	2.95
32791-84-7	ZINC000255260724	437	9.19238	1.66
95258-16-5	ZINC000085542179	438	9.19053	2.77
50656-92-3	ZINC000084615182	439	9.18867	2.48
107646-82-2	ZINC000014860734	440	9.18682	1.88
19057-60-4	ZINC000238809530	441	9.18497	1.99
574-84-5	ZINC000000113309	442	9.18312	2.73
83-95-4	ZINC000000035525	443	9.18126	3.01
23013-84-5	ZINC000013130921	444	9.17941	2.24
33390-42-0	ZINC000005854400	445	9.17756	1.71
65332-45-8	ZINC000014811582	446	9.17571	2.61
53859-06-6	ZINC000014512025	447	9.17386	1.56
1772588-99-4	ZINC001772820064	448	9.172	2.85
18465-71-9	ZINC000013459854	449	9.17015	2.29
472-30-0	ZINC000040584549	450	9.1683	2.87
119309-02-3	ZINC000013373993	451	9.16645	2.62
1616080-84-2	ZINC001772820198	452	9.16459	3.57
6610-56-6	ZINC000095911669	453	9.16274	2.73
38230-99-8	ZINC000936069305	454	9.16089	2.58
77-60-1	ZINC000008234227	455	9.15904	2.29
529-40-8	ZINC000001645590	456	9.15718	1.96
21499-66-1	ZINC001772820437	457	9.15533	2.24
14371-10-9	ZINC000001532777	458	9.15348	3.29
115713-06-9	ZINC000085799038	459	9.15163	1.61
80621-54-1	ZINC000014814969	460	9.14978	2.67
482-53-1	ZINC000000538127	461	9.14792	2.71
178600-68-5	ZINC000096023830	462	9.14607	1.78
32174-62-2	ZINC000006018559	463	9.14422	1.67
160498-00-0	ZINC000096023925	464	9.14237	2.82
1372558-35-4	ZINC001077995394	465	9.14051	2.66
340702-68-3	ZINC000150664861	466	9.13866	2.63
163956-16-9	ZINC000049888963	467	9.13681	2.48
3681-99-0	ZINC000004098745	468	9.13496	2.53
808769-54-2	ZINC000253589617	469	9.1331	2.68
15097-74-2	ZINC000013341180	470	9.13125	2.52
54854-91-0	ZINC000014642224	471	9.1294	3.38
83015-88-7	ZINC000032180511	472	9.12755	2.73
58139-22-3	ZINC000095788020	473	9.12569	1.99
480-64-8	ZINC000000901157	474	9.12384	2.83
18456-02-5	ZINC001772820274	475	9.12199	1.7
2513-33-9	ZINC000000439984	476	9.12014	2.99
77658-39-0	ZINC001077995381	477	9.11829	3.46
80418-24-2	ZINC001772820258	478	9.11643	3.21
55303-93-0	ZINC000031165518	479	9.11458	2.41
84414-40-4	ZINC000255259155	480	9.11273	2.46
185020-38-6	ZINC000000900117	481	9.11088	2.56
139891-98-8	ZINC000618006095	482	9.10902	2.76
130395-54-9	ZINC001772820495	483	9.10717	2.66
104901-05-5	ZINC000140565820	484	9.10532	2.42
113626-22-5	ZINC001077996745	485	9.10347	2.26
528-43-8	ZINC000000001645	486	9.10161	2.98
869384-82-7	ZINC000035966135	487	9.09976	2.14
116782-73-1	ZINC001083040736	488	9.09791	2.01
197781-84-3	ZINC000038991192	489	9.09606	2.92
116498-58-9	ZINC000096023772	490	9.0942	0.88
470-37-1	ZINC000004215351	491	9.09235	2.18
98665-65-7	ZINC000261493077	492	9.0905	1.49
57296-22-7	ZINC000096086455	493	9.08865	1.95
1167483-18-2	ZINC000077031593	494	9.0868	2.57
145237-05-4	ZINC001772820505	495	9.08494	2.18
89647-62-1	ZINC001772820501	496	9.08309	2.84
1207181-35-8	ZINC000169650001	497	9.08124	2.08
924901-58-6	ZINC001772820467	498	9.07939	2.1
1966183-72-1	ZINC001772820499	499	9.07753	2.42
22767-72-2	ZINC000001600508	500	9.07568	3.25
1180-71-8	ZINC000004096134	501	9.07383	3.14
53729-52-5	ZINC001772820493	502	9.07198	2.99
59870-68-7	ZINC000004098719	503	9.07012	2.06
638203-32-4	ZINC000150352471	504	9.06827	2.18
156791-81-0	ZINC000049823192	505	9.06642	2.71
491-54-3	ZINC000006411540	506	9.06457	2.35
35349-68-9	ZINC000013382495	507	9.06272	2.98
36150-23-9	ZINC000006018661	508	9.06086	2.97
59204-61-4	ZINC001077995390	509	9.05901	2.94
227289-51-2	ZINC000013384934	510	9.05716	2.96
127098-14-0	ZINC000085809062	511	9.05531	1.67
27208-80-6	ZINC000004098633	512	9.05345	1.69
14694-15-6	ZINC000096023779	513	9.0516	2.41
18296-45-2	ZINC000004098336	514	9.04975	2.01
480-33-1	ZINC000004521655	515	9.0479	2.52
823182-23-6	ZINC000135760605	516	9.04604	2.43
56973-65-0	ZINC000013378210	517	9.04419	2.31
20486-27-5	ZINC000116139657	518	9.04234	2.56
112503-87-4	ZINC000014655552	519	9.04049	1.93
482-35-9	ZINC000004096845	520	9.03863	2.54
27530-67-2	ZINC000004098352	521	9.03678	2.62
149998-38-9	ZINC000195964422	522	9.03493	2.82
56973-51-4	ZINC000018270805	523	9.03308	2.11
84575-10-0	ZINC000013400293	524	9.03123	2.75
76843-23-7	ZINC000014681569	525	9.02937	2.61
1007387-95-2	ZINC000100060223	526	9.02752	3.23
189351-15-3	ZINC000004096338	527	9.02567	2.1
465-00-9	ZINC000031158038	528	9.02382	2.4
62517-34-4	ZINC000014455505	529	9.02196	2.04
773850-91-2	ZINC000096023815	530	9.02011	2.01
885044-12-2	ZINC000238783645	531	9.01826	2.02
157528-81-9	ZINC000096023733	532	9.01641	1.92
104012-37-5	ZINC000096054715	533	9.01455	2.1
106623-23-8	ZINC000098214408	534	9.0127	2.79
97169-44-3	ZINC000008952338	535	9.01085	2.45
518-82-1	ZINC000003824868	536	9.009	3.37
19210-12-9	ZINC000255224193	537	9.00714	2.15
864719-17-5	ZINC000014696123	538	9.00529	1.91
38642-49-8	ZINC000070450818	539	9.00344	2.7
1552-94-9	ZINC000001577023	540	9.00159	2.6
492-14-8	ZINC000004098238	541	8.99974	2.79
481-45-8	ZINC000003204049	542	8.99788	3.1
1011762-93-8	ZINC001772820244	543	8.99603	2.69
1432063-35-8	ZINC000096023891	544	8.99418	2.94
70360-12-2	ZINC000002561270	545	8.99233	2.13
942609-65-6	ZINC000014811208	546	8.99047	2.78
83011-43-2	ZINC000002566749	547	8.98862	2.54
95066-33-4	ZINC000256461681	548	8.98677	2.94
526-06-7	ZINC000005493040	549	8.98492	2.23
139115-59-6	ZINC000085945710	550	8.98306	2.51
36062-04-1	ZINC000004649679	551	8.98121	2.1
64215-95-8	ZINC000049898467	552	8.97936	2.61
15401-69-1	ZINC000006484761	553	8.97751	1.96
1623410-12-7	ZINC001772820255	554	8.97565	2.83
270249-38-2	ZINC000014711638	555	8.9738	2.35
857672-34-5	ZINC000096023818	556	8.97195	3.29
89595-71-1	ZINC000017434107	557	8.9701	3.19
179603-47-5	ZINC001077995423	558	8.96825	2.34
887333-30-4	ZINC000238761510	559	8.96639	3.43
28178-92-9	ZINC000017917268	560	8.96454	2.98
6871-21-2	ZINC000031166315	561	8.96269	2.31
288248-46-4	ZINC001772820075	562	8.96084	2.48
1268140-15-3	ZINC000095933331	563	8.95898	2.88
1318173-53-3	ZINC001772820056	564	8.95713	1.61
54854-91-0	ZINC000086043672	565	8.95528	2.69
1092952-62-9	ZINC000105741014	566	8.95343	2.71
95066-33-4	ZINC000256461662	567	8.95157	2.67
15345-89-8	ZINC000000899562	568	8.94972	2.83
130838-00-5	ZINC001772820206	569	8.94787	3.07
70578-24-4	ZINC000306121784	570	8.94602	3.1
1188932-15-1	ZINC000261493090	571	8.94417	1.89
126-17-0	ZINC000008214722	572	8.94231	2.96
69120-06-5	ZINC000005158948	573	8.94046	2.71
911714-91-5	ZINC001077995420	574	8.93861	3.46
635-65-4	ZINC000018007499	575	8.93676	2.74
106518-63-2	ZINC000031302381	576	8.9349	3.2
1207185-03-2	ZINC000049769671	577	8.93305	2.67
157664-03-4	ZINC000261492935	578	8.9312	2.39
481-46-9	ZINC000001531664	579	8.92935	2.01
66648-45-1	ZINC000014505065	580	8.92749	2.2
53755-77-4	ZINC000032296315	581	8.92564	2.39
2023822-39-9	ZINC001772820142	582	8.92379	2.72
1083200-79-6	ZINC000031167467	583	8.92194	2.67
143120-46-1	ZINC001772820035	584	8.92008	3.22
20516-23-8	ZINC000014650280	585	8.91823	2.06
97534-10-6	ZINC000141662219	586	8.91638	1.61
162762-93-8	ZINC000015167712	587	8.91453	2.16
67567-15-1	ZINC000256497800	588	8.91268	1.93
340702-68-3	ZINC000169748435	589	8.91082	2.73
1079941-35-7	ZINC000169516241	590	8.90897	2.63
117421-22-4	ZINC000214550690	591	8.90712	3.57
333361-85-6	ZINC000248243877	592	8.90527	3.09
145237-05-4	ZINC001772820506	593	8.90341	2.23
61117-89-3	ZINC000095914618	594	8.90156	2.47
1902173-22-1	ZINC001772820289	595	8.89971	2.4
77263-06-0	ZINC000002570158	596	8.89786	2.88
471-66-9	ZINC000245204479	597	8.896	1.51
207446-92-2	ZINC000034541932	598	8.89415	1.98
94530-85-5	ZINC000013380497	599	8.8923	2.32
165689-32-7	ZINC000238773902	600	8.89045	2.34
4373-41-5	ZINC000003941107	601	8.88859	2.34
498-02-2	ZINC000000162515	602	8.88674	2.32
52328-96-8	ZINC000100067315	603	8.88489	3.04
2023822-40-2	ZINC001772820166	604	8.88304	3.1
52628-62-3	ZINC001082884047	605	8.88119	1.54
164991-53-1	ZINC000059773669	606	8.87933	1.72
120462-45-5	ZINC001772820464	607	8.87748	3.23
958631-84-0	ZINC000102990818	608	8.87563	2.65
90852-99-6	ZINC000031417264	609	8.87378	2.08
1134138-66-1	ZINC001772820295	610	8.87192	2.88
160498-02-2	ZINC000096023925	611	8.87007	2.6
26833-87-4	ZINC000026011099	612	8.86822	3.04
33570-04-6	ZINC000008679998	613	8.86637	2.26
524-17-4	ZINC000004098077	614	8.86451	1.83
41744-39-2	ZINC000005132927	615	8.86266	2.58
71831-00-0	ZINC000004098746	616	8.86081	2.68
93753-33-4	ZINC000014585161	617	8.85896	2.73
31427-08-4	ZINC000013509501	618	8.85711	3.39
504-88-1	ZINC000000895862	619	8.85525	2.32
858360-61-9	ZINC001079928301	620	8.8534	2.31
21082-33-7	ZINC000031158791	621	8.85155	2.53
110-15-6	ZINC000000895030	622	8.8497	2.67
22934-99-2	ZINC000006484605	623	8.84784	1.72
1344876-77-2	ZINC000061704564	624	8.84599	1.75
1220707-33-4	ZINC001772820233	625	8.84414	2.27
213769-80-3	ZINC000238768810	626	8.84229	2.91
18525-14-9	ZINC000017141917	627	8.84043	2.17
518-17-2	ZINC000000898159	628	8.83858	2.32
528-63-2	ZINC000018269677	629	8.83673	2.33
22031-64-7	ZINC000013533964	630	8.83488	1.79
82958-45-0	ZINC000257522643	631	8.83302	2.42
486-60-2	ZINC000005842977	632	8.83117	2.92
126253-41-6	ZINC000001645304	633	8.82932	2.17
82513-70-0	ZINC001077996718	634	8.82747	3.31
2065228-60-4	ZINC001772820226	635	8.82562	3.15
100198-09-2	ZINC000008829493	636	8.82376	2.27
81426-17-7	ZINC000014505997	637	8.82191	3.06
160498-00-0	ZINC000261492349	638	8.82006	3.16
923950-05-4	ZINC000238761793	639	8.81821	3.52
572-30-5	ZINC000028540146	640	8.81635	2.05
62499-71-2	ZINC000013480169	641	8.8145	3.12
81907-62-2	ZINC000049793324	642	8.81265	2.74
875585-30-1	ZINC000096023862	643	8.8108	3.09
15648-86-9	ZINC000031155545	644	8.80894	1.29
107633-69-2	ZINC000014775265	645	8.80709	2.91
160498-02-2	ZINC000261492348	646	8.80524	2.16
2671-32-1	ZINC000261493073	647	8.80339	2.6
137018-33-8	ZINC000195952151	648	8.80153	1.89
357-57-3	ZINC000001069090	649	8.79968	3.09
1269839-26-0	ZINC000206485300	650	8.79783	2.63
1456598-64-3	ZINC000261492893	651	8.79598	2.74
1042143-83-8	ZINC000252498428	652	8.79413	2.66
190381-82-9	ZINC000238747599	653	8.79227	2.21
26575-95-1	ZINC000033831141	654	8.79042	2.23
7362-39-2	ZINC000000040395	655	8.78857	2.37
116424-70-5	ZINC000059589055	656	8.78672	2.47
1959-02-09	ZINC000004095858	657	8.78486	2.68
691009-85-5	ZINC000095912108	658	8.78301	3.08
123702-97-6	ZINC000014610079	659	8.78116	2.69
38395-02-7	ZINC000084616331	660	8.77931	1.83
274675-25-1	ZINC000014762532	661	8.77745	2.45
5188-73-8	ZINC000006483405	662	8.7756	1.85
7224-61-5	ZINC000002007969	663	8.77375	2.36
213912-46-0	ZINC000015203768	664	8.7719	3.3
521-51-7	ZINC000014640460	665	8.77004	3.24
87440-56-0	ZINC000004098320	666	8.76819	2.91
92631-66-8	ZINC001772820462	667	8.76634	2.52
7507-89-3	ZINC000000900185	668	8.76449	2.58
1188932-15-1	ZINC000261493091	669	8.76264	3.08
93395-30-3	ZINC000038143867	670	8.76078	1.73
49776-92-3	ZINC000255204281	671	8.75893	2.84
1259-94-5	ZINC001772820141	672	8.75708	3.26
38965-51-4	ZINC000031155036	673	8.75523	2.96
121747-90-8	ZINC000014558326	674	8.75337	2.44
259099-25-7	ZINC001772820491	675	8.75152	2.49
522-30-5	ZINC000001727527	676	8.74967	2.87
29836-27-9	ZINC001772820167	677	8.74782	2.63
52389-15-8	ZINC000098214406	678	8.74596	2.38
617722-55-1	ZINC000013378428	679	8.74411	2.65
39524-08-8	ZINC000584567041	680	8.74226	2.22
140447-14-9	ZINC000096023780	681	8.74041	2.85
552-58-9	ZINC000000058117	682	8.73856	2.18
476-70-0	ZINC000000135449	683	8.7367	3.26
113558-03-5	ZINC000070457415	684	8.73485	2.11
126176-79-2	ZINC000096023690	685	8.733	3.45
116499-73-1	ZINC000049767363	686	8.73115	1.99
37064-30-5	ZINC000096095372	687	8.72929	2.59
59086-93-0	ZINC000013864652	688	8.72744	1.45
6790-58-5	ZINC000001043941	689	8.72559	2.78
35467-43-7	ZINC000026846068	690	8.72374	2.76
201534-10-3	ZINC000040378969	691	8.72188	2.39
194940-15-3	ZINC000020216329	692	8.72003	2.34
119318-15-9	ZINC000095636199	693	8.71818	2.62
645414-25-1	ZINC000096086444	694	8.71633	2.23
90332-65-3	ZINC000261493017	695	8.71447	3.76
20243-59-8	ZINC000014813714	696	8.71262	1.76
37239-47-7	ZINC000257520559	697	8.71077	3.4
100432-87-9	ZINC000407947101	698	8.70892	2.27
133568-79-3	ZINC000034412775	699	8.70707	1.86
35354-74-6	ZINC000000001536	700	8.70521	2.76
19942-04-2	ZINC000040897880	701	8.70336	2.51
4657-58-3	ZINC000256415696	702	8.70151	2.34
63807-90-9	ZINC000013311953	703	8.69966	3.11
94942-49-1	ZINC000014728438	704	8.6978	2.43
1394156-45-6	ZINC000299815232	705	8.69595	1.65
1890153-71-5	ZINC000238748201	706	8.6941	2.22
67667-71-4	ZINC000254153336	707	8.69225	2.54
218290-59-6	ZINC000086022972	708	8.69039	2.79
22697-65-0	ZINC000003870887	709	8.68854	2.68
259753-12-3	ZINC000238752238	711	8.68484	1.91
2306-27-6	ZINC000001531698	712	8.68298	2.9
23179-78-4	ZINC000409444204	713	8.68113	3.08
126223-29-8	ZINC000031417663	714	8.67928	2.78
18797-79-0	ZINC000031494865	715	8.67743	2.65
23313-21-5	ZINC000004098672	716	8.67558	2.53
58-61-7	ZINC000002169830	717	8.67372	2.62
269739-78-8	ZINC000049898174	718	8.67187	2.68
106894-43-3	ZINC000253485416	719	8.67002	2.55
929637-35-4	ZINC001772820092	720	8.66817	2.87
103188-43-8	ZINC000000299667	721	8.66631	2.41
13403-14-0	ZINC000005998359	722	8.66446	2.37
62574-30-5	ZINC000085637445	723	8.66261	2.38
86361-55-9	ZINC000013340267	724	8.66076	3.04
436-77-1	ZINC000038148193	725	8.6589	2.31
116782-73-1	ZINC000255202044	726	8.65705	3.08
52275-04-4	ZINC000014444505	727	8.6552	2.93
907583-51-1	ZINC000014611388	728	8.65335	1.86
883859-83-4	ZINC000014760147	729	8.6515	3.14
85769-33-1	ZINC001077996760	730	8.64964	2.85
33627-28-0	ZINC000005722319	731	8.64779	2.62
119188-37-3	ZINC000034645559	732	8.64594	2.22
22226-73-9	ZINC000085541027	733	8.64409	2.44
112137-81-2	ZINC001772820062	734	8.64223	2.59
890928-81-1	ZINC000072124782	735	8.64038	2.09
1042143-83-8	ZINC000252498430	736	8.63853	2.76
381728-34-3	ZINC000199027146	737	8.63668	3.06
77836-86-3	ZINC000005158589	738	8.63482	2.97
17184-21-3	ZINC000008234236	739	8.63297	3.46
81053-14-7	ZINC000014497243	740	8.63112	2.5
76792-94-4	ZINC000014728266	741	8.62927	1.56
4197-97-1	ZINC000004175443	742	8.62741	2.62
1616757-60-8	ZINC000222165360	743	8.62556	3.29
213329-46-5	ZINC000013335593	744	8.62371	2.39
642-17-1	ZINC000053174616	745	8.62186	2.75
259143-58-3	ZINC000095910514	746	8.62001	2.05
1186021-77-1	ZINC000049017435	747	8.61815	2.51
22255-13-6	ZINC000006569127	748	8.6163	2.79
51803-68-0	ZINC000072320516	749	8.61445	2.61
561-47-7	ZINC000095912310	750	8.6126	2.54
95258-15-4	ZINC001772820477	751	8.61074	2.42
80514-14-3	ZINC000238759777	752	8.60889	2.03
451478-47-0	ZINC001077996681	753	8.60704	1.39
67600-94-6	ZINC000028901152	754	8.60519	2.54
495-32-9	ZINC000000051923	755	8.60333	2.85
78536-37-5	ZINC001772820267	756	8.60148	2.68
34444-37-6	ZINC000001667454	757	8.59963	4.07
63320-67-2	ZINC000238760614	758	8.59778	2.61
1422506-49-7	ZINC001077996731	759	8.59592	2.73
73584-67-5	ZINC000049823044	760	8.59407	1.99
40246-10-4	ZINC000004349794	761	8.59222	2.46
106055-11-2	ZINC000013409479	762	8.59037	2.88
232266-08-9	ZINC000073407474	763	8.58852	1.99
224186-05-4	ZINC000003974649	764	8.58666	2.49
155709-41-4	ZINC000034063294	765	8.58481	2.56
111035-65-5	ZINC000043242049	766	8.58296	2.81
3153-73-9	ZINC000013482058	767	8.58111	2.37
70191-83-2	ZINC000252587337	768	8.57925	3.35
32507-77-0	ZINC000005761092	769	8.5774	2.39
40661-45-8	ZINC000028538360	770	8.57555	2.05
1383977-51-2	ZINC000255264407	771	8.5737	3.35
6880-91-7	ZINC000004716567	772	8.57184	2.4
466-26-2	ZINC000070691758	773	8.56999	2.26
81495-71-8	ZINC000257408775	774	8.56814	2.6
244277-75-6	ZINC000299808564	775	8.56629	2.17
22649-04-3	ZINC000013307187	776	8.56444	2.06
124868-11-7	ZINC000005892775	777	8.56258	2.81
66-22-8	ZINC000000895045	778	8.56073	2.97
16851-21-1	ZINC000026187321	779	8.55888	1.98
62560-95-6	ZINC000013480172	780	8.55703	2.36
4263-88-1	ZINC000001667643	781	8.55517	1.68
34425-25-7	ZINC000049723059	782	8.55332	1.43
15486-34-7	ZINC000005733532	783	8.55147	1.87
19533-92-7	ZINC000253500842	784	8.54962	2.7
49776-92-3	ZINC001772820401	785	8.54776	3.11
142203-64-3	ZINC000042877500	786	8.54591	2.78
87-66-1	ZINC000000330141	787	8.54406	2.66
52706-07-7	ZINC000014692679	788	8.54221	1.87
1932405-61-2	ZINC000261492992	789	8.54035	2.77
163513-81-3	ZINC000001572128	790	8.5385	1.94
464-92-6	ZINC000008221271	791	8.53665	3.4
76472-88-3	ZINC000014762498	792	8.5348	3.41
24240-04-8	ZINC000019204597	793	8.53295	2.66
114027-39-3	ZINC000257416445	794	8.53109	2.14
1083195-05-4	ZINC000031168435	795	8.52924	2.65
145643-96-5	ZINC000003980114	796	8.52739	2.08
1372527-25-7	ZINC000084709284	797	8.52554	2.72
625-04-7	ZINC000001510269	798	8.52368	1.65
18456-02-5	ZINC001772820275	799	8.52183	2.72
1623410-12-7	ZINC000299817892	800	8.51998	2.94
79004-25-4	ZINC000014439526	801	8.51813	3.09
1616683-55-6	ZINC000299817501	802	8.51627	1.67
41983-91-9	ZINC000000113294	803	8.51442	2.39
6926-14-3	ZINC000040953255	804	8.51257	3.37
518-83-2	ZINC000013481200	805	8.51072	3.19
94530-85-5	ZINC000013380496	806	8.50886	3.61
2239-88-5	ZINC000001280637	807	8.50701	2.43
177262-32-7	ZINC000028818696	808	8.50516	2.42
478158-77-9	ZINC000014780953	809	8.50331	1.96
47326-53-4	ZINC001077996454	811	8.4996	2.84
482-25-7	ZINC000000898098	812	8.49775	2.99
488-76-6	ZINC000256080898	813	8.4959	2.83
58124-18-8	ZINC000014728044	814	8.49405	2.88
35761-54-7	ZINC000028637181	815	8.49219	2.68
84104-71-2	ZINC000031459237	816	8.49034	2.22
15291-75-5	ZINC000100017511	817	8.48849	2.22
29376-68-9	ZINC000006483517	818	8.48664	2.61
380487-65-0	ZINC000095911289	819	8.48478	2.58
989-51-5	ZINC000003870412	820	8.48293	2
55-21-0	ZINC000000152996	822	8.47923	2.2
193694-24-5	ZINC000014452264	823	8.47737	1.79
219861-73-1	ZINC000014639665	824	8.47552	2.31
90685-26-0	ZINC000049899423	825	8.47367	2.66
519-34-6	ZINC000003983883	826	8.47182	2.65
198827-23-5	ZINC000014646858	827	8.46997	2.51
41059-79-4	ZINC000238809207	828	8.46811	2.24
32791-84-7	ZINC000082092694	829	8.46626	2.4
120462-42-2	ZINC001772820413	830	8.46441	2.51
35241-80-6	ZINC000000899352	831	8.46256	2.7
55290-63-6	ZINC000002572532	832	8.4607	2.19
39946-41-3	ZINC000135696282	833	8.45885	3.02
405157-84-8	ZINC000034557402	834	8.457	1.91
57-50-1	ZINC000004217475	835	8.45515	2.92
6812-87-9	ZINC000137192488	836	8.45329	1.08
15486-24-5	ZINC000013533701	837	8.45144	2.38
197781-84-3	ZINC001772820277	838	8.44959	2.54
564-20-5	ZINC000000519827	839	8.44774	2.97
120278-25-3	ZINC000138512795	840	8.44589	2.55
1053189-53-9	ZINC001772820287	841	8.44403	3.73
33458-82-1	ZINC000253591190	842	8.44218	1.6
77949-42-9	ZINC000005166389	843	8.44033	3.93
261351-23-9	ZINC000095914837	844	8.43848	2.79
2188162-96-9	ZINC001077991887	845	8.43662	3.1
58115-31-4	ZINC000006096537	846	8.43477	1.73
1514669-21-6	ZINC001772820144	847	8.43292	2.64
94530-87-7	ZINC000034187470	848	8.43107	2.14
63910-76-9	ZINC000001858767	849	8.42921	2.05
263764-83-6	ZINC000013380091	850	8.42736	3.05
126594-66-9	ZINC000013414861	851	8.42551	2.08
19879-32-4	ZINC000015115059	852	8.42366	2.05
2216-51-5	ZINC000001482164	853	8.4218	3.24
80454-42-8	ZINC000082123162	854	8.41995	2.67
21852-80-2	ZINC000044005644	855	8.4181	3.33
6871-44-9	ZINC000252478200	856	8.41625	2.72
113681-11-1	ZINC000034566529	857	8.4144	1.57
17297-56-2	ZINC000026495094	858	8.41254	2.68
33419-42-0	ZINC000003938684	859	8.41069	2.57
86917-79-5	ZINC000015207421	860	8.40884	1.97
205534-17-4	ZINC000085648732	861	8.40699	2.17
76792-94-4	ZINC000014728265	862	8.40513	2.86
53209-27-1	ZINC000033861486	863	8.40328	2.66
120-05-8	ZINC000000897736	864	8.40143	2.45
163434-73-9	ZINC000072115307	865	8.39958	2.32
82209-72-1	ZINC000049872065	866	8.39772	3.2
30359-01-4	ZINC000013384944	867	8.39587	2.54
66900-93-4	ZINC000014712101	868	8.39402	1.59
5835-26-7	ZINC000004097908	869	8.39217	3.04
197781-85-4	ZINC001077996767	870	8.39031	2.45
82344-82-9	ZINC000014651078	871	8.38846	2.75
2450-53-5	ZINC000100037586	872	8.38661	2.28
17306-46-6	ZINC000003978800	873	8.38476	2.47
80681-45-4	ZINC000031158236	874	8.38291	2.03
1872403-23-0	ZINC001077991938	875	8.38105	2.16
28590-40-1	ZINC000001559232	876	8.3792	2.52
1454619-70-5	ZINC001772820260	877	8.37735	3.09
70868-78-9	ZINC000103395327	878	8.3755	2.47
142279-41-2	ZINC000096023869	879	8.37364	1.86
35833-70-6	ZINC000096023832	880	8.37179	3.04
65894-41-9	ZINC000014410699	881	8.36994	2.82
7716-14-5	ZINC000166780122	882	8.36809	2.86
82373-94-2	ZINC000006092613	883	8.36623	2.85
361-09-1	ZINC000006858022	884	8.36438	2.5
1313434-74-0	ZINC000247919332	885	8.36253	2.88
475-81-0	ZINC000000607911	886	8.36068	1.83
482-45-1	ZINC000000296185	887	8.35883	2.76
53170-93-7	ZINC000013118172	888	8.35697	2.37
90536-74-6	ZINC000014775716	889	8.35512	2.95
20086-06-0	ZINC000006032343	890	8.35327	2.76
120061-96-3	ZINC000095918648	891	8.35142	2.7
470-17-7	ZINC000003897049	892	8.34956	2.87
6052-73-9	ZINC000013480243	893	8.34771	2.63
226904-40-1	ZINC000014508555	894	8.34586	2.09
1432062-53-7	ZINC000087493100	895	8.34401	2.63
145237-05-4	ZINC001772820503	896	8.34215	2.64
98665-66-8	ZINC001772820191	897	8.3403	2.42
680617-50-9	ZINC000040379468	898	8.33845	2.21
848669-09-0	ZINC000087493035	899	8.3366	2.43
73030-71-4	ZINC000005373275	900	8.33474	1.55
140447-22-9	ZINC000049833286	901	8.33289	2.21
95258-14-3	ZINC000070457347	902	8.33104	2.8
1414883-82-1	ZINC001772820060	903	8.32919	2.85
1402067-84-8	ZINC001615811909	904	8.32734	2.03
480-47-7	ZINC000000899141	905	8.32548	1.93
1194-98-5	ZINC000000895809	906	8.32363	2.14
221002-11-5	ZINC000085996824	907	8.32178	3.27
60129-64-8	ZINC000261492238	908	8.31993	2.69
189689-32-5	ZINC000059588627	909	8.31807	3.32
162473-22-5	ZINC000014821978	910	8.31622	3.19
1660156-04-6	ZINC001772820507	911	8.31437	2.69
51415-02-2	ZINC000085643466	912	8.31252	2.7
50276-98-7	ZINC000003652723	914	8.30881	2.23
3785-24-8	ZINC000000899620	915	8.30696	2.15
64657-21-2	ZINC000013111092	916	8.30511	2.13
93372-87-3	ZINC000095933383	917	8.30325	2.08
154418-16-3	ZINC000096023863	918	8.3014	2.15
684217-08-1	ZINC000616581882	919	8.29955	2.29
79439-84-2	ZINC001772820470	920	8.2977	2.82
486-62-4	ZINC000001081322	921	8.29585	2.19
18411-75-1	ZINC000039205618	922	8.29399	2.02
549-32-6	ZINC000025763680	923	8.29214	2.19
29080-58-8	ZINC000013838615	924	8.29029	2.66
90332-64-2	ZINC001772820288	925	8.28844	2.67
30413-84-4	ZINC000013408607	926	8.28658	2.58
6792-07-0	ZINC001077996670	927	8.28473	2.26
119533-63-0	ZINC001772820074	928	8.28288	2.66
487-41-2	ZINC000056874329	929	8.28103	2.73
1251748-32-9	ZINC000141368911	930	8.27917	2.38
41060-16-6	ZINC000002392262	931	8.27732	2
61448-03-1	ZINC000071329375	932	8.27547	2.8
115370-61-1	ZINC000070455015	933	8.27362	2.75
327601-97-8	ZINC001077995395	934	8.27177	2.22
28420-25-9	ZINC000409444134	935	8.26991	2.41
74336-91-7	ZINC000085837460	936	8.26806	2.31
147976-35-0	ZINC000019831535	937	8.26621	2.24
104668-88-4	ZINC000002572528	938	8.26436	2.65
29883-15-6	ZINC000008214484	939	8.2625	1.71
18836-52-7	ZINC000013838505	940	8.26065	2.52
385384-26-9	ZINC000034654586	941	8.2588	2.63
35943-38-5	ZINC000006070296	942	8.25695	2.16
76880-93-8	ZINC000038143574	943	8.25509	3.14
4382-33-6	ZINC000001689533	944	8.25324	2.62
1438-62-6	ZINC000004802492	945	8.25139	2.29
4373-41-5	ZINC000039560074	946	8.24954	3.14
1627521-95-2	ZINC000238789107	947	8.24768	2.22
532-91-2	ZINC000000403022	948	8.24583	1.39
1088-17-1	ZINC000005962466	949	8.24398	2.65
370102-93-5	ZINC000000899920	950	8.24213	0.99
143212-60-6	ZINC000255208130	951	8.24028	2.24
28398-06-3	ZINC000014856069	952	8.23842	2.08
149415-62-3	ZINC000138394421	953	8.23657	2.8
7678-85-5	ZINC000006525252	954	8.23472	1.56
58546-34-2	ZINC000095098933	955	8.23287	2.69
163391-76-2	ZINC000256630948	956	8.23101	3.07
15823-04-8	ZINC000001702387	957	8.22916	1.48
61825-98-7	ZINC000008214406	958	8.22731	1.61
122855-49-6	ZINC000014722471	959	8.22546	2.02
67765-58-6	ZINC000005134835	960	8.2236	2.67
133568-79-3	ZINC000034412774	961	8.22175	2.54
39262-14-1	ZINC000096095535	962	8.2199	2.43
82451-18-1	ZINC000038143799	963	8.21805	1.99
1422506-51-1	ZINC001077996769	964	8.21619	2.6
41682-21-7	ZINC000006069566	965	8.21434	2.84
171864-20-3	ZINC001077996863	966	8.21249	2.4
20086-06-0	ZINC001772820043	967	8.21064	2.46
27391-16-8	ZINC000002039759	968	8.20879	2.98
68296-27-5	ZINC000006018655	969	8.20693	2.27
57296-22-7	ZINC000096023902	970	8.20508	3.02
126594-66-9	ZINC000013414864	971	8.20323	2.64
175862-40-5	ZINC000038514138	972	8.20138	2.66
155836-29-6	ZINC000005999135	973	8.19952	2.92
116709-67-2	ZINC000256110580	974	8.19767	1.78
262355-96-4	ZINC000034418976	975	8.19582	2.16
22226-73-9	ZINC000085977430	976	8.19397	3.26
26575-93-9	ZINC000026832137	977	8.19211	2.44
51225-30-0	ZINC000005195795	978	8.19026	1.93
1616683-51-2	ZINC000299817392	979	8.18841	2.56
1269839-26-0	ZINC000206485257	980	8.18656	2.52
10267-31-9	ZINC000013370397	981	8.1847	2.97
5171-37-9	ZINC000004995167	982	8.18285	2.33
64657-21-2	ZINC000071766833	983	8.181	2.88
187539-57-7	ZINC000139203427	984	8.17915	1.91
99217-75-1	ZINC001077996748	985	8.1773	2.55
922169-96-8	ZINC000028818563	986	8.17544	3.65
1388075-44-2	ZINC001772820084	987	8.17359	2.48
548-29-8	ZINC000004104829	988	8.17174	2.64
542-44-9	ZINC000032840892	989	8.16989	2.05
72061-63-3	ZINC000155319216	990	8.16803	1.57
6792-07-0	ZINC001077996672	991	8.16618	2.45
58749-22-7	ZINC000003873123	992	8.16433	2.57
921211-29-2	ZINC000261492852	993	8.16248	2.8
165459-53-0	ZINC000257559116	994	8.16062	2.93
33606-81-4	ZINC000005998680	995	8.15877	2.87
854038-96-3	ZINC000036424256	996	8.15692	2.45
886226-15-9	ZINC000013377936	997	8.15507	2.21
64181-07-3	ZINC001772820239	998	8.15322	2.69
30220-43-0	ZINC000026893082	999	8.15136	1.42
3570-62-5	ZINC000005998918	1000	8.14951	2.88
51020-45-2	ZINC000031739248	1001	8.14766	2.04
2457-80-9	ZINC000004228245	1002	8.14581	2.08
34293-09-9	ZINC000015119312	1003	8.14395	2.49
1007387-95-2	ZINC001772820147	1004	8.1421	2.53
96422-52-5	ZINC000006116424	1005	8.14025	1.84
53662-98-9	ZINC000257779622	1006	8.1384	2.74
1207181-59-6	ZINC000257132761	1007	8.13654	1.44
7154-01-0	ZINC000000402227	1008	8.13469	3.02
72500-11-9	ZINC000013514661	1009	8.13284	2.4
35286-58-9	ZINC000252587188	1010	8.13099	2.19
23795-02-0	ZINC000000152538	1011	8.12913	3.53
116782-73-1	ZINC001083040735	1012	8.12728	2.51
104700-97-2	ZINC000034192003	1013	8.12543	2.38
69480-06-4	ZINC000014814034	1014	8.12358	1.9
21104-28-9	ZINC000000968444	1015	8.12173	3.26
65408-91-5	ZINC000004098425	1016	8.11987	2.99
78012-28-9	ZINC001772820205	1017	8.11802	2.72
54377-24-1	ZINC000014807132	1018	8.11617	2.38
2172624-69-8	ZINC001772820228	1019	8.11432	2.84
117-81-7	ZINC000003860432	1020	8.11246	2.65
188970-21-0	ZINC000039014143	1021	8.11061	3.61
288259-72-3	ZINC000039094891	1022	8.10876	2.29
1432058-90-6	ZINC000096023687	1023	8.10691	1.76
34540-22-2	ZINC000256072866	1024	8.10505	2.64
139079-42-8	ZINC000002585551	1025	8.1032	2.59
81263-96-9	ZINC001772820156	1026	8.10135	1.99
144398-34-5	ZINC000015120610	1027	8.0995	2.12
60820-94-2	ZINC000008234239	1028	8.09764	2.25
104055-79-0	ZINC000095933392	1029	8.09579	2.96
22888-70-6	ZINC000002033589	1030	8.09394	2.76
333361-85-6	ZINC000248243875	1031	8.09209	2.33
808769-54-2	ZINC000253589610	1032	8.09024	3.05
83324-51-0	ZINC000085993838	1033	8.08838	3.23
95732-59-5	ZINC000198820141	1034	8.08653	2.04
220328-03-0	ZINC000100826366	1035	8.08468	1.74
491-71-4	ZINC000000519621	1036	8.08283	1.74
57420-46-9	ZINC000031475539	1037	8.08097	2.78
82958-45-0	ZINC000257522642	1038	8.07912	2.2
28189-90-4	ZINC000038908691	1039	8.07727	3.16
959421-20-6	ZINC000101775787	1040	8.07542	3.18
63768-17-2	ZINC000014485815	1041	8.07356	2.7
78749-47-0	ZINC000238739908	1042	8.07171	2.14
63529-06-6	ZINC000014777824	1043	8.06986	3.09
38419-75-9	ZINC000001504703	1044	8.06801	2.26
5027-30-5	ZINC000031158975	1045	8.06616	3.06
23513-14-6	ZINC000001531846	1046	8.0643	2.54
211238-60-7	ZINC000014616227	1047	8.06245	2.08
31222-32-9	ZINC000095910110	1048	8.0606	2.55
16100-84-8	ZINC000137459842	1049	8.05875	2.34
38230-99-8	ZINC000936069306	1050	8.05689	2.91
144106-78-5	ZINC000013459534	1051	8.05504	1.83
509078-16-4	ZINC000136591148	1052	8.05319	1.58
486-66-8	ZINC000018847034	1053	8.05134	2.22
6587-37-7	ZINC001772820200	1054	8.04948	3
210537-05-6	ZINC000028875634	1055	8.04763	2.96
481-49-2	ZINC000030726863	1056	8.04578	2.27
130855-22-0	ZINC001077995399	1057	8.04393	2.67
4206-58-0	ZINC000001530242	1058	8.04207	3.24
155683-00-4	ZINC001772820259	1059	8.04022	2.48
104700-98-3	ZINC000034192001	1060	8.03837	1.79
30636-90-9	ZINC000008740122	1061	8.03652	2.19
613684-55-2	ZINC000103282012	1062	8.03467	2.27
511-15-9	ZINC000001872131	1063	8.03281	2.36
73435-47-9	ZINC001772820483	1064	8.03096	2.52
24274-48-4	ZINC000005844421	1065	8.02911	2.94
7044-31-7	ZINC000015449116	1066	8.02726	2.62
165338-28-3	ZINC001772820087	1067	8.0254	3.25
952473-86-8	ZINC001772820269	1068	8.02355	2.54
1188398-15-3	ZINC000035456770	1069	8.0217	2.09
874201-05-5	ZINC000013431836	1070	8.01985	2.39
61899-42-1	ZINC000015120948	1071	8.01799	2.23
14982-11-7	ZINC000033832651	1072	8.01614	3.03
1616757-60-8	ZINC000222165463	1073	8.01429	1.89
119943-46-3	ZINC000058519820	1074	8.01244	2.09
79592-91-9	ZINC000238808939	1075	8.01058	2.06
58812-37-6	ZINC000253617731	1076	8.00873	2.32
13241-33-3	ZINC000049538626	1077	8.00688	2.61
97938-30-2	ZINC000002008850	1078	8.00503	2.93
139101-67-0	ZINC000013340225	1079	8.00318	2.41
1820034-05-6	ZINC000014710225	1080	8.00132	2.12
64421-27-8	ZINC000006032117	1081	7.99947	2.22
52213-27-1	ZINC000014980289	1082	7.99762	2.74
130838-00-5	ZINC000096023884	1083	7.99577	1.76
108-78-1	ZINC000000897751	1084	7.99391	2.62
121710-02-9	ZINC000096023879	1085	7.99206	1.64
153483-31-9	ZINC000004983279	1086	7.99021	2.45
157528-81-9	ZINC000238769741	1087	7.98836	3.25
1351617-74-7	ZINC000255221936	1088	7.9865	3.06
132586-69-7	ZINC001772820184	1089	7.98465	2.74
564-14-7	ZINC000096023876	1090	7.9828	2.6
1092555-03-7	ZINC001077995413	1091	7.98095	2.09
1198400-52-0	ZINC000653848622	1092	7.97909	2.36
488-82-4	ZINC000000895205	1093	7.97724	1.95
56407-87-5	ZINC000102942001	1094	7.97539	3.04
84414-40-4	ZINC001772820234	1095	7.97354	3.49
464-86-8	ZINC000005137921	1096	7.97169	2.18
52330-11-7	ZINC000255274226	1097	7.96983	3.68
23811-50-9	ZINC000299817510	1098	7.96798	2.41
51276-34-7	ZINC000015120346	1099	7.96613	2.91
62043-53-2	ZINC000096023906	1100	7.96428	2.91
188300-19-8	ZINC000095913457	1101	7.96242	2.41
595-15-3	ZINC000004097836	1102	7.96057	2.5
852875-96-8	ZINC000085570799	1103	7.95872	3.19
2181-84-2	ZINC000000265512	1104	7.95687	2.21
955135-37-2	ZINC000070454680	1105	7.95501	2.39
89498-91-9	ZINC000096023701	1106	7.95316	1.96
162411-67-8	ZINC000013335261	1107	7.95131	3.24
151334-06-4	ZINC000137986274	1108	7.94946	2.62
82-02-0	ZINC000000056654	1109	7.94761	3.29
2798-20-1	ZINC000001723552	1110	7.94575	2.43
135293-13-9	ZINC000238758694	1111	7.9439	3.79
138965-88-5	ZINC000049793116	1112	7.94205	2.47
1313434-74-0	ZINC000203535351	1113	7.9402	2.69
349112-30-7	ZINC000034654216	1114	7.93834	2.42
56218-46-3	ZINC000096023726	1115	7.93649	3.21
55033-90-4	ZINC000049823084	1116	7.93464	2.47
217466-37-0	ZINC000044386282	1117	7.93279	1.89
90411-12-4	ZINC000005838160	1118	7.93093	1.85
27013-91-8	ZINC000095098996	1119	7.92908	2.49
61844-62-0	ZINC000014504998	1120	7.92723	2.46
115783-35-2	ZINC000013484131	1121	7.92538	2.96
163060-07-9	ZINC000253591483	1122	7.92352	2.49
15266-35-0	ZINC000066102692	1124	7.91982	1.74
32507-66-7	ZINC000013541228	1125	7.91797	1.95
53963-43-2	ZINC000049722871	1126	7.91612	2.5
512-04-9	ZINC000006857614	1127	7.91426	2.91
437-64-9	ZINC000005732375	1128	7.91241	2.78
15291-77-7	ZINC000100067334	1129	7.91056	1.99
490-46-0	ZINC000000119988	1130	7.90871	2.92
57576-29-1	ZINC000028646804	1131	7.90685	2.78
751-03-1	ZINC000004097789	1132	7.905	2.45
50428-93-8	ZINC000238782162	1133	7.90315	3.22
99-20-7	ZINC000004095531	1134	7.9013	2.15
53947-92-5	ZINC000013408703	1135	7.89944	2.77
808769-54-2	ZINC000253589613	1136	7.89759	3.03
2222285-83-6	ZINC001077991873	1137	7.89574	2.14
67600-94-6	ZINC000028901157	1138	7.89389	2.39
24314-59-8	ZINC001772820080	1139	7.89203	2.41
56684-87-8	ZINC000013340870	1140	7.89018	3.4
66648-45-1	ZINC000014505068	1141	7.88833	2.24
87085-00-5	ZINC000044281738	1142	7.88648	2.35
20784-60-5	ZINC000019816069	1143	7.88463	3.09
57296-22-7	ZINC000096086453	1144	7.88277	2.17
1417805-15-2	ZINC000095588252	1146	7.87907	2.99
495-02-3	ZINC000001658901	1147	7.87722	2.5
1077-28-7	ZINC000001544807	1148	7.87536	1.7
52096-50-1	ZINC000014692691	1149	7.87351	2.14
1246012-25-8	ZINC000100059124	1150	7.87166	2.45
22841-42-5	ZINC000013331160	1151	7.86981	2.36
66056-18-6	ZINC000005854529	1152	7.86795	1
87261-77-6	ZINC000197396103	1153	7.8661	2.47
41447-16-9	ZINC000014695442	1154	7.86425	1.91
156368-84-2	ZINC000035465491	1155	7.8624	2.28
1588516-87-3	ZINC000299817685	1156	7.86055	2.36
112523-91-8	ZINC001077996505	1157	7.85869	3.04
84-74-2	ZINC000001693431	1158	7.85684	1.23
6040-19-3	ZINC000004097796	1159	7.85499	1.93
22338-67-6	ZINC000006032270	1160	7.85314	3.27
1181224-13-4	ZINC001772820268	1161	7.85128	2.4
19397-28-5	ZINC000013384328	1162	7.84943	2.13
28957-04-2	ZINC000070454188	1163	7.84758	1.75
85769-33-1	ZINC001077996761	1164	7.84573	1.93
58115-29-0	ZINC000014813748	1165	7.84387	2.73
162602-04-2	ZINC000014642741	1166	7.84202	2.19
73255-40-0	ZINC000006066927	1167	7.84017	2.46
18085-97-7	ZINC000014779854	1168	7.83832	2.93
65853-04-5	ZINC000049808207	1169	7.83646	1.68
61775-19-7	ZINC000005999025	1170	7.83461	2
237407-59-9	ZINC000085838277	1171	7.83276	2.81
1639257-36-5	ZINC001772820204	1172	7.83091	2.27
83150-97-4	ZINC000095910019	1173	7.82906	1.82
95298-47-8	ZINC000085645169	1174	7.8272	2.34
27740-43-8	ZINC000030726889	1175	7.82535	1.15
139115-59-6	ZINC000085945712	1176	7.8235	2.67
64199-78-6	ZINC000042891385	1177	7.82165	2.88
88206-46-6	ZINC000029056306	1178	7.81979	2.71
1514669-21-6	ZINC000261492338	1179	7.81794	3.29
26585-13-7	ZINC000005141386	1180	7.81609	2.45
13323-67-6	ZINC000005733641	1181	7.81424	1.65
26575-93-9	ZINC000026832141	1182	7.81238	1.41
115334-04-8	ZINC000096023758	1183	7.81053	2.93
1401419-90-6	ZINC000261491884	1184	7.80868	2.01
61448-03-1	ZINC001772820197	1186	7.80497	2.22
204185-91-1	ZINC000038944336	1187	7.80312	1.76
14599-48-5	ZINC001077995400	1188	7.80127	2.82
104594-70-9	ZINC000000001083	1189	7.79942	1.77
5610-40-2	ZINC000019701765	1190	7.79757	2.85
125002-91-7	ZINC000005854394	1191	7.79571	2.21
67920-48-3	ZINC000238755229	1192	7.79386	3.04
73793-68-7	ZINC000031457534	1193	7.79201	2.2
6871-44-9	ZINC000252478199	1194	7.79016	2.6
28200-65-9	ZINC000001559632	1195	7.7883	3.32
357-57-3	ZINC000005670218	1196	7.78645	2.85
41442-57-3	ZINC000049881936	1197	7.7846	2.51
41137-85-3	ZINC000013378196	1198	7.78275	2.4
145643-96-5	ZINC000000595402	1199	7.78089	2.21
1616683-51-2	ZINC000299817393	1200	7.77904	2.81
120211-98-5	ZINC000042852273	1201	7.77719	2.3
73731-86-9	ZINC000013341107	1202	7.77534	2.92
611-40-5	ZINC000004098747	1203	7.77349	2.94
93673-81-5	ZINC000014585200	1204	7.77163	2.33
70389-88-7	ZINC000034235782	1205	7.76978	3.41
31721-94-5	ZINC000006119185	1206	7.76793	2.43
848669-08-9	ZINC000087493036	1207	7.76608	2.22
64032-49-1	ZINC000026977303	1208	7.76422	2.73
105108-20-1	ZINC000034345480	1209	7.76237	2.59
421583-14-4	ZINC001772820148	1210	7.76052	1.7
30890-35-8	ZINC000038264323	1211	7.75867	2.48
74161-25-4	ZINC000014762971	1212	7.75681	2.32
87355-32-6	ZINC000255249850	1213	7.75496	3.27
25161-41-5	ZINC000030731451	1214	7.75311	3.09
93078-83-2	ZINC000014811058	1215	7.75126	1.81
84687-43-4	ZINC000238809356	1216	7.7494	2.45
65907-75-7	ZINC000100091452	1217	7.74755	2.66
14215-86-2	ZINC000005157983	1218	7.7457	2.81
40357-59-3	ZINC001772820516	1219	7.74385	2.05
60048-88-6	ZINC000096086415	1220	7.742	2.93
246870-75-7	ZINC000014780934	1221	7.74014	2.3
95258-15-4	ZINC000085542170	1222	7.73829	3.74
22478-65-5	ZINC000005294955	1223	7.73644	2
70191-83-2	ZINC000252587338	1224	7.73459	2.6
118985-27-6	ZINC000095587606	1225	7.73273	2.16
33429-83-3	ZINC000005640267	1226	7.73088	2.75
54081-48-0	ZINC000136163915	1227	7.72903	2.96
74474-76-3	ZINC000006067191	1228	7.72718	1.68
37239-47-7	ZINC000257520560	1229	7.72532	3.12
961-29-5	ZINC000003869608	1230	7.72347	2.52
99217-63-7	ZINC000033832185	1231	7.72162	1.52
35109-93-4	ZINC000008234192	1232	7.71977	3.06
19186-35-7	ZINC000001575139	1233	7.71791	1.9
62517-34-4	ZINC000014455506	1234	7.71606	3.28
28178-92-9	ZINC000018103090	1235	7.71421	3.31
51847-92-8	ZINC000014762987	1236	7.71236	2.28
77-53-2	ZINC000003978626	1237	7.71051	3.12
262350-52-7	ZINC000095562852	1238	7.70865	2
405281-76-7	ZINC000049888876	1239	7.7068	3.32
517-28-2	ZINC000000155804	1240	7.70495	2.78
529-55-5	ZINC000004097895	1241	7.7031	3.97
33417-17-3	ZINC000001261680	1242	7.70124	1.94
94942-49-1	ZINC000014728437	1243	7.69939	2.8
19057-60-4	ZINC000245224355	1244	7.69754	2.18
72917-31-8	ZINC000001573356	1245	7.69569	2.19
2318-78-7	ZINC000038799467	1246	7.69383	2.09
10391-08-9	ZINC000095912414	1247	7.69198	2.91
148-03-8	ZINC000003875985	1248	7.69013	2.61
127-22-0	ZINC000004082498	1249	7.68828	2.52
147714-71-4	ZINC000096023878	1250	7.68642	1.81
34540-22-2	ZINC000256072869	1251	7.68457	2.76
15291-75-5	ZINC000004245650	1252	7.68272	2.47
28957-04-2	ZINC000012661785	1253	7.68087	2.46
136997-68-7	ZINC000085887745	1254	7.67902	2.86
18456-02-5	ZINC001772820272	1255	7.67716	2.2
775351-91-2	ZINC000014819385	1256	7.67531	2.48
1206464-65-4	ZINC000014642275	1257	7.67346	3.58
150033-85-5	ZINC001077996844	1258	7.67161	2.57
30315-04-9	ZINC000096023768	1259	7.66975	2.43
22864-92-2	ZINC000000900902	1260	7.6679	2.53
72826-63-2	ZINC000022055629	1261	7.66605	3.02
20675-51-8	ZINC000001531363	1262	7.6642	2.16
1423809-64-6	ZINC000203454382	1263	7.66234	3.03
24513-41-5	ZINC000013401019	1264	7.66049	2.53
57-83-0	ZINC000004428529	1265	7.65864	2.84
120722-04-5	ZINC001772820069	1266	7.65679	3.44
497-76-7	ZINC000000518554	1267	7.65494	2.81
165338-27-2	ZINC001772820101	1268	7.65308	2.29
17303-67-2	ZINC000001686158	1269	7.65123	3.7
84567-08-8	ZINC000238757921	1270	7.64938	3.24
120-14-9	ZINC000000155456	1271	7.64753	2.85
79406-10-3	ZINC000238759091	1272	7.64567	2.83
52659-56-0	ZINC000205780671	1273	7.64382	2.49
75513-81-4	ZINC000014437964	1274	7.64197	2.8
76689-98-0	ZINC000095910334	1275	7.64012	2.19
1309079-08-0	ZINC000238735164	1276	7.63826	2.82
2189-80-2	ZINC000031334747	1277	7.63641	2.82
160333-27-7	ZINC000238741012	1278	7.63456	2.7
61186-24-1	ZINC001077995455	1279	7.63271	2.18
1344876-77-2	ZINC000061704565	1280	7.63085	2.38
53-43-0	ZINC000003807917	1281	7.629	2.59
74683-19-5	ZINC000014818114	1282	7.62715	2.73
7562-61-0	ZINC000000135467	1283	7.6253	1.77
2761-77-5	ZINC000013660272	1284	7.62345	2.75
110642-44-9	ZINC000169721173	1285	7.62159	2.37
26486-92-0	ZINC000013485105	1286	7.61974	2.38
113963-39-6	ZINC000031158506	1287	7.61789	3.04
470-17-7	ZINC000000525655	1288	7.61604	2.32
115610-30-5	ZINC000040845735	1289	7.61418	2.33
1033747-78-2	ZINC001772820072	1290	7.61233	1.95
1353676-65-9	ZINC000199432925	1291	7.61048	2.53
1372527-25-7	ZINC000084709278	1292	7.60863	2.38
58-96-8	ZINC000002583633	1293	7.60677	2.75
484-74-2	ZINC000000900208	1294	7.60492	2.41
514-10-3	ZINC000002267806	1295	7.60307	2.67
333361-85-6	ZINC000248243872	1296	7.60122	2.85
904665-71-0	ZINC001772820202	1297	7.59936	3.1
28955-30-8	ZINC000012153650	1298	7.59751	1.8
4666-84-6	ZINC000005037532	1299	7.59566	2.63
849245-34-7	ZINC000014486841	1300	7.59381	1.85
1269839-24-8	ZINC000206485376	1301	7.59196	2.79
99132-99-7	ZINC001772820461	1302	7.5901	3.13
95258-12-1	ZINC001772820440	1303	7.58825	2.3
35030-38-7	ZINC000205876878	1304	7.5864	2.6
224186-05-4	ZINC000014164010	1305	7.58455	3.33
464-85-7	ZINC000005137921	1306	7.58269	2.59
3301-61-9	ZINC000004097891	1307	7.58084	2.49
1345109-46-7	ZINC000261493097	1308	7.57899	1.15
5008-48-0	ZINC000014695361	1309	7.57714	1.61
168281-05-8	ZINC001772820502	1310	7.57528	2.96
1354900-65-4	ZINC001772820398	1311	7.57343	2.48
62499-27-8	ZINC000003881790	1312	7.57158	3.35
55511-08-5	ZINC000013378711	1313	7.56973	2.4
26296-50-4	ZINC000096023857	1314	7.56788	2.59
37687-34-6	ZINC000000900914	1315	7.56602	3.03
41447-15-8	ZINC000014695445	1317	7.56232	2.77
99-50-3	ZINC000000013246	1318	7.56047	2.49
113626-76-9	ZINC000039013169	1319	7.55861	2.54
107870-88-2	ZINC000049793376	1320	7.55676	2.59
66107-60-6	ZINC000100060037	1321	7.55491	2.03
78454-17-8	ZINC000094303279	1322	7.55306	2.8
5127-64-0	ZINC000003870414	1323	7.5512	1.94
552-57-8	ZINC000575416832	1324	7.54935	2.81
1052228-70-2	ZINC000238744812	1325	7.5475	2.46
224186-03-2	ZINC000003974648	1326	7.54565	2.76
182132-59-8	ZINC001079929366	1327	7.54379	1.65
24316-19-6(free	ZINC000013385014	1328	7.54194	4.1
349534-73-2	ZINC000255284888	1329	7.54009	1.03
80434-33-9	ZINC000013439524	1330	7.53824	1.26
1072-93-1	ZINC000005226611	1331	7.53639	2.53
874303-34-1	ZINC000014727609	1332	7.53453	2.76
691009-85-5	ZINC000136327916	1333	7.53268	2.33
224186-05-4	ZINC000014164017	1334	7.53083	2.27
6754-58-1	ZINC000005158937	1335	7.52898	2.55
1810034-40-2	ZINC000299817868	1336	7.52712	2.88
26121-56-2	ZINC000056874331	1337	7.52527	2.37
20196-89-8	ZINC000059589077	1338	7.52342	2.31
315236-68-1	ZINC000038991229	1339	7.52157	3
106533-60-2	ZINC000150349645	1340	7.51971	1.8
1013-69-0	ZINC000005765136	1341	7.51786	2.35
904891-20-9	ZINC000049650124	1342	7.51601	3.04
15266-38-3	ZINC000031168223	1343	7.51416	2.22
166322-14-1	ZINC000029042359	1344	7.5123	2.37
111518-94-6	ZINC000257545754	1345	7.51045	2.74
638203-32-4	ZINC000150352478	1346	7.5086	2.21
38183-03-8	ZINC000000057657	1347	7.50675	2.5
16790-92-4	ZINC001077996797	1348	7.5049	2.53
35214-82-5	ZINC000014650631	1349	7.50304	2.11
26509-45-5	ZINC000000480807	1350	7.50119	2.43
1220891-22-4	ZINC000077031627	1351	7.49934	2.56
139726-29-7	ZINC000015148440	1352	7.49749	3.01
467-81-2	ZINC000042835006	1353	7.49563	2.47
477-33-8	ZINC000002040493	1354	7.49378	2.49
517883-38-4	ZINC000100059407	1355	7.49193	1.99
2055073-74-8	ZINC001772820263	1356	7.49008	1.69
50-89-5	ZINC000000025672	1357	7.48822	3.02
94529-97-2	ZINC000013383630	1358	7.48637	2.58
17983-82-3	ZINC000072937984	1359	7.48452	1.25
86639-52-3	ZINC000004099013	1360	7.48267	2.39
15297-92-4	ZINC000000338411	1361	7.48082	1.86
1617-70-5	ZINC000004081760	1362	7.47896	3.34
76045-49-3	ZINC000095630244	1363	7.47711	2.99
13401-40-6	ZINC000000899892	1364	7.47526	3.33
90-33-5	ZINC000000058121	1365	7.47341	2.48
52591-10-3	ZINC000014725518	1366	7.47155	2.12
38916-91-5	ZINC000002039761	1367	7.4697	1.28
2649-64-1	ZINC000039170928	1368	7.46785	2.84
123043-54-9	ZINC001772820498	1369	7.466	1.91
1616683-51-2	ZINC000299817394	1370	7.46414	1.99
39011-92-2	ZINC000067910642	1371	7.46229	2.54
57719-76-3	ZINC000098214422	1372	7.46044	2.23
23141-27-7	ZINC000038139549	1373	7.45859	2.48
117614-84-3	ZINC000013340726	1374	7.45673	2.95
60337-67-9	ZINC000096023864	1375	7.45488	2.6
905929-95-5	ZINC000059925934	1376	7.45303	2.35
101046-79-1	ZINC000085995768	1377	7.45118	2.23
471-69-2	ZINC000004097717	1378	7.44933	2.95
142566-61-8	ZINC000006381041	1379	7.44747	2.24
5041-67-8	ZINC000033832091	1380	7.44562	2.58
10154-42-4	ZINC000001587303	1381	7.44377	3.43
66056-30-2	ZINC000005762063	1382	7.44192	1.68
34080-08-5	ZINC000043606386	1383	7.44006	2.55
21967-41-9	ZINC000003943903	1384	7.43821	2.86
100079-34-3	ZINC000014728124	1385	7.43636	2.82
736140-70-8	ZINC000034546587	1386	7.43451	2.74
26063-96-7	ZINC000013382499	1387	7.43265	2.64
2957-21-3	ZINC000000338283	1388	7.4308	2.47
70-70-2	ZINC000000001890	1389	7.42895	1.52
14260-99-2	ZINC000031159654	1390	7.4271	2.35
57576-34-8	ZINC000013339680	1391	7.42524	2.81
63976-69-2	ZINC000014620030	1392	7.42339	2.2
449729-89-9	ZINC000067911623	1393	7.42154	3.19
164661-12-5	ZINC000087493008	1394	7.41969	2.25
639-36-1	ZINC001077996755	1395	7.41784	2.41
63358-12-3	ZINC000038143823	1397	7.41413	3.11
55395-07-8	ZINC000066166674	1398	7.41228	2.95
214150-74-0	ZINC000039034569	1399	7.41043	2.83
58-95-7	ZINC000004172337	1400	7.40857	3.27
38710-26-8	ZINC000252481574	1401	7.40672	2.21
65247-27-0	ZINC000067910874	1402	7.40487	2.63
1312716-25-8	ZINC000473135113	1403	7.40302	2.37
84-99-1	ZINC000001668225	1404	7.40116	2.46
152175-76-3	ZINC001772820432	1405	7.39931	2.57
79114-77-5	ZINC000035271475	1406	7.39746	2.52
333798-10-0	ZINC000006520504	1407	7.39561	2.68
145544-91-8	ZINC000012153354	1409	7.3919	3.21
1592-70-7	ZINC000005732268	1410	7.39005	2.82
83708-70-7	ZINC000014642046	1411	7.3882	2.75
493-95-8	ZINC000100064387	1412	7.38635	2.52
385384-29-2	ZINC001772820240	1413	7.38449	2.6
176520-13-1	ZINC000096023705	1414	7.38264	2.98
491-80-5	ZINC000018847037	1415	7.38079	2.95
221289-20-9	ZINC000038749537	1416	7.37894	2.8
478-61-5	ZINC000030726840	1417	7.37708	1.61
52617-37-5	ZINC000015657778	1418	7.37523	2.48
1260-05-5	ZINC001772820079	1419	7.37338	2.77
69573-60-0	ZINC000044418163	1420	7.37153	2.3
82209-76-5	ZINC000042878570	1421	7.36967	1.83
6100-74-9	ZINC000001656180	1422	7.36782	2.37
26808-51-5	ZINC000014856017	1423	7.36597	2.37
33417-17-3	ZINC000017744128	1424	7.36412	1.9
19716-66-6	ZINC000014682001	1425	7.36227	1.42
6138-88-1	ZINC000015150842	1426	7.36041	2.59
4184-34-3	ZINC000073413521	1427	7.35856	2.53
888482-17-5	ZINC001077995416	1428	7.35671	1.88
39945-41-0	ZINC000002015811	1429	7.35486	1.93
4136-37-2	ZINC000002528042	1430	7.353	2.37
525-21-3	ZINC000002566165	1431	7.35115	3.36
126737-42-6	ZINC001077996742	1432	7.3493	2.75
135531-75-8	ZINC000248381164	1433	7.34745	2.55
95258-11-0	ZINC001772820390	1434	7.34559	2.46
179457-70-6	ZINC000014447798	1435	7.34374	2.16
28342-33-8	ZINC000000900932	1436	7.34189	2.38
28957-08-6	ZINC000169641718	1437	7.34004	2.88
7608-44-8	ZINC000001763468	1438	7.33818	2.99
3681-93-4	ZINC000004245684	1439	7.33633	1.88
5945-86-8	ZINC000038143866	1440	7.33448	3.24
122-48-5	ZINC000000526834	1441	7.33263	3.14
1392213-93-2	ZINC000102165650	1442	7.33078	2.01
27468-20-8	ZINC000196512953	1443	7.32892	2.54
69219-24-5	ZINC000014618682	1444	7.32707	2.15
533-31-3	ZINC000000164504	1445	7.32522	2.07
80151-89-9	ZINC001078028184	1446	7.32337	2.52
145237-05-4	ZINC001772820504	1447	7.32151	3.73
33237-37-5	ZINC000257741531	1448	7.31966	2.37
52438-21-8	ZINC000000241087	1449	7.31781	2.2
548-76-5	ZINC000005732527	1450	7.31596	3.11
1585-68-8	ZINC000013384147	1451	7.3141	2.16
160623-47-2	ZINC000014763077	1452	7.31225	2.26
483-14-7	ZINC000019535049	1453	7.3104	2
1188282-00-9	ZINC001772820089	1454	7.30855	2.55
19914-20-6	ZINC000049823175	1455	7.30669	2.78
23417-92-7	ZINC000015222580	1456	7.30484	2.85
487-52-5	ZINC000012428433	1457	7.30299	3.34
205115-75-9	ZINC000015120612	1458	7.30114	2.03
20493-56-5	ZINC000013412797	1459	7.29929	2.49
862255-64-9	ZINC001772820262	1460	7.29743	2.22
4031-55-4	ZINC000014588749	1461	7.29558	1.72
80510-09-4	ZINC000013533861	1462	7.29373	3.34
116709-67-2	ZINC000256110572	1463	7.29188	3.32
340702-68-3	ZINC000250829995	1464	7.29002	3.04
485-72-3	ZINC000018847036	1465	7.28817	2.34
92-48-8	ZINC000000057740	1466	7.28632	2.89
117842-09-8	ZINC000257403023	1467	7.28447	2.09
66056-19-7	ZINC000005158963	1468	7.28261	2.41
478314-67-9	ZINC000036468921	1469	7.28076	2.84
79592-91-9	ZINC000238808942	1470	7.27891	2.04
1110-56-1	ZINC000096085756	1471	7.27706	2.07
5273-86-9	ZINC000013424754	1472	7.27521	2.36
129673-86-5	ZINC000014444280	1473	7.27335	3.1
1206788-61-5	ZINC000064527818	1474	7.2715	2.59
186140-36-3	ZINC000096086218	1475	7.26965	2.14
41682-30-8	ZINC000095933354	1476	7.2678	2.8
1220891-22-4	ZINC000077031618	1477	7.26594	1.97
475-83-2	ZINC000000320698	1478	7.26409	2.41
162059-94-1	ZINC000095913786	1479	7.26224	2.27
25514-31-2	ZINC001772820453	1480	7.26039	2.92
85329-59-5	ZINC000014448958	1481	7.25853	3.05
51593-96-5	ZINC000014504838	1482	7.25668	2.76
23455-44-9	ZINC000014716273	1483	7.25483	2.59
41743-41-3	ZINC000004098619	1484	7.25298	3.27
67828-62-0	ZINC000005856007	1485	7.25112	1.55
25018-67-1	ZINC000002545101	1486	7.24927	2.71
22427-39-0	ZINC000255285372	1487	7.24742	2.73
50-28-2	ZINC000013520815	1488	7.24557	1.65
148409-36-3	ZINC000000900187	1489	7.24372	3.09
63399-37-1	ZINC001078028420	1490	7.24186	2.24
30435-26-8	ZINC000206392140	1491	7.24001	2.72
6750-10-03	ZINC000013485667	1493	7.23631	2.44
259653-54-8	ZINC000015206091	1494	7.23445	2.66
2447-70-3	ZINC001772820186	1495	7.2326	3.44
36545-53-6	ZINC000013130935	1496	7.23075	1.5
21499-66-1	ZINC000101188301	1497	7.2289	2.17
1459784-57-6	ZINC000238783315	1498	7.22704	2.22
25514-31-2	ZINC001772820452	1499	7.22519	2.25
14531-47-6	ZINC000071295210	1500	7.22334	2.22
171438-55-4	ZINC001077996857	1501	7.22149	2.19
160498-00-0	ZINC000261492348	1502	7.21963	2.23
614-82-4	ZINC000001845974	1503	7.21778	2.04
88086-86-6	ZINC000036428891	1504	7.21593	3.36
14957-38-1	ZINC000014587259	1505	7.21408	3.05
99132-97-5	ZINC001772820500	1506	7.21223	3.21
58543-16-1	ZINC000242498440	1507	7.21037	3.16
51-55-8	ZINC000100009278	1508	7.20852	2.48
118525-40-9	ZINC000014762797	1509	7.20667	2.91
1190225-47-8	ZINC000096023616	1510	7.20482	2.43
723-97-7	ZINC000001867781	1511	7.20296	2.69
33900-74-2	ZINC000015117949	1512	7.20111	1.89
19895-95-5	ZINC000004654810	1513	7.19926	2.91
24694-80-2	ZINC000936069303	1514	7.19741	3.21
113773-90-3	ZINC000238763085	1515	7.19555	1.69
51652-39-2	ZINC000001506568	1516	7.1937	2.47
20188-85-6	ZINC000150371913	1517	7.19185	2.19
184587-72-2	ZINC000013382497	1518	7.19	2.61
1616757-59-5	ZINC000238784369	1519	7.18815	2.82
302-27-2	ZINC000169300321	1520	7.18629	2.14
63910-76-9	ZINC000072320238	1521	7.18444	2.17
526-87-4	ZINC000022055080	1522	7.18259	2.16
163391-76-2	ZINC000256631123	1523	7.18074	1.63
116709-67-2	ZINC000256110563	1524	7.17888	2.37
434-13-9	ZINC000003918156	1525	7.17703	1.87
13956-51-9	ZINC000085511731	1526	7.17518	2.74
41137-86-4	ZINC000013377898	1527	7.17333	3.71
29070-92-6	ZINC000005369099	1528	7.17147	2.12
117479-87-5	ZINC000070450809	1529	7.16962	2.64
138870-96-9	ZINC000013377924	1530	7.16777	3.05
133164-11-1	ZINC000000477939	1531	7.16592	2.53
13902-62-0	ZINC001077995432	1532	7.16406	1.83
84745-94-8	ZINC000254131984	1533	7.16221	2.56
6902-91-6	ZINC000253635153	1534	7.16036	2.86
250691-57-7	ZINC000014690290	1535	7.15851	2.41
84799-31-5	ZINC000034887090	1536	7.15666	2.3
381728-34-3	ZINC000001531663	1537	7.1548	2.09
85889-15-2	ZINC000096023695	1538	7.15295	2.26
474-25-9	ZINC000003977879	1539	7.1511	2.55
19764-35-3	ZINC000013514686	1540	7.14925	2.5
73815-21-1	ZINC000015120795	1541	7.14739	2.74
269742-39-4	ZINC001772820410	1542	7.14554	2.39
59014-02-7	ZINC000028709513	1543	7.14369	1.8
129578-07-0	ZINC000015262935	1544	7.14184	2.34
80971-60-4	ZINC000012153889	1546	7.13813	3.38
33419-42-0	ZINC000004245621	1547	7.13628	3.37
41451-75-6	ZINC000255220112	1548	7.13443	2.86
57296-22-7	ZINC000096086454	1549	7.13257	2.93
80514-14-3	ZINC001772820509	1550	7.13072	1.92
352658-23-2	ZINC000575448251	1551	7.12887	1.81
98665-65-7	ZINC000575448253	1552	7.12702	2.57
89354-45-0	ZINC000033830829	1553	7.12517	2.94
7622-53-9	ZINC000003473319	1554	7.12331	2.11
33627-28-0	ZINC000005722322	1555	7.12146	3.54
482-70-2	ZINC000000899240	1556	7.11961	2.83
64790-68-7	ZINC000015273426	1557	7.11776	2.55
50276-96-5	ZINC000028462577	1558	7.1159	3.27
1829580-18-8	ZINC001772820427	1559	7.11405	2.96
51-55-8	ZINC000100009280	1560	7.1122	1.73
480-11-5	ZINC000005998558	1561	7.11035	2.67
438536-34-6	ZINC000012153065	1562	7.10849	1.87
23963-54-4	ZINC000034239747	1563	7.10664	3.19
39729-21-0	ZINC000252497238	1564	7.10479	2.43
52286-59-6	ZINC000252448791	1565	7.10294	2.52
769928-72-5	ZINC001077995418	1566	7.10108	3.33
137319-34-7	ZINC000015149475	1567	7.09923	2.96
18296-44-1	ZINC000004098355	1568	7.09738	1.71
154992-17-3	ZINC000014780962	1569	7.09553	3.22
2222285-84-7	ZINC001077991932	1570	7.09368	1.57
569-80-2	ZINC000014644952	1571	7.09182	2.51
126-17-0	ZINC000008214721	1572	7.08997	1.81
20460-33-7	ZINC000169652803	1573	7.08812	2.49
17678-76-1	ZINC000013480423	1574	7.08627	1.89
63139-16-2	ZINC000257515259	1575	7.08441	2.23
116424-69-2	ZINC000004098760	1576	7.08256	2.04
102349-35-9	ZINC000013381016	1577	7.08071	2.66
89706-39-8	ZINC000261492832	1578	7.07886	3.23
1372527-40-6	ZINC000084711477	1579	7.077	2.81
79916-77-1	ZINC000008234345	1580	7.07515	2.54
56252-02-9	ZINC000014504316	1581	7.0733	3.2
471-53-4	ZINC000019203131	1582	7.07145	1.57
54854-91-0	ZINC000257428667	1583	7.0696	2.47
3778-25-4	ZINC000044031885	1584	7.06774	2.49
857859-82-6	ZINC000238752395	1585	7.06589	2.44
1134138-66-1	ZINC000096903077	1586	7.06404	2.98
79439-84-2	ZINC001772820469	1587	7.06219	2.62
115074-93-6	ZINC000049844716	1588	7.06033	1.49
473451-73-9	ZINC000013383711	1589	7.05848	2.79
173075-45-1	ZINC000036435471	1590	7.05663	2.6
945619-74-9	ZINC001772820218	1591	7.05478	2.66
1399-49-1	ZINC001076447980	1592	7.05292	2.12
206560-99-8	ZINC000014814927	1593	7.05107	2.73
150710-72-8	ZINC000013382795	1594	7.04922	3.14
136196-47-9	ZINC000014511220	1595	7.04737	2.97
213769-80-3	ZINC000082046436	1596	7.04551	2.65
11027-63-7	ZINC000004098330	1597	7.04366	2.91
127350-68-9	ZINC000034770248	1598	7.04181	2.31
86293-25-6	ZINC000100159215	1599	7.03996	3.53
125263-65-2	ZINC001077996651	1600	7.03811	3.06
50656-77-4	ZINC000015272050	1601	7.03625	2.63
85372-72-1	ZINC001077997724	1602	7.0344	3.17
59219-64-6	ZINC000038690012	1603	7.03255	2.2
512781-45-2	ZINC001772820473	1604	7.0307	2.04
57430-03-2	ZINC000013460498	1605	7.02884	2.05
1287220-29-4	ZINC000067910579	1606	7.02699	2.42
1449-09-8	ZINC000004097817	1607	7.02514	2.69
61521-74-2	ZINC000000900254	1608	7.02329	2.48
24211-30-1	ZINC000004098306	1609	7.02143	3.31
78214-33-2	ZINC001772820010	1610	7.01958	2.61
118627-52-4	ZINC000059587075	1611	7.01773	2.84
13161-75-6	ZINC000004081606	1612	7.01588	2.71
3542-72-1	ZINC000006090922	1613	7.01402	2.86
2033-89-8	ZINC000000388573	1614	7.01217	2.77
552-59-0	ZINC000018847044	1615	7.01032	1.91
50656-77-4	ZINC000015272054	1616	7.00847	2.02
1372527-40-6	ZINC000084711474	1617	7.00662	1.96
122717-54-8	ZINC000095912822	1618	7.00476	3.38
24513-51-7	ZINC000096023614	1619	7.00291	2.93
15071-56-4	ZINC000013282986	1620	7.00106	2.6
49776-92-3	ZINC001772820402	1621	6.99921	2.63
18609-17-1	ZINC000004654817	1622	6.99735	2.15
153-18-4	ZINC000004096846	1623	6.9955	2.94
1017277-40-5	ZINC000238775404	1624	6.99365	2.59
76-80-2	ZINC000004098748	1625	6.9918	2.71
71610-00-9	ZINC000095545437	1626	6.98994	2.79
19716-26-8	ZINC000049833002	1627	6.98809	1.95
327-97-9	ZINC000002138728	1628	6.98624	2.1
644-06-4	ZINC000000056510	1629	6.98439	2.29
376362-03-7	ZINC000013380009	1630	6.98254	2.74
117204-81-6	ZINC000014711695	1631	6.98068	2.6
130-86-9	ZINC000020111233	1632	6.97883	2.29
942480-13-9	ZINC000015193877	1633	6.97698	2.7
4684-28-0	ZINC000238767582	1634	6.97513	2.38
24480-45-3	ZINC000032024272	1635	6.97327	3.04
501-96-2	ZINC000000506564	1636	6.97142	1.74
29838-67-3	ZINC000031156118	1637	6.96957	2.75
2172624-66-5	ZINC001772820229	1638	6.96772	2.88
501-94-0	ZINC000000164581	1639	6.96586	1.82
156974-99-1	ZINC000101556410	1640	6.96401	2.02
1370556-82-3	ZINC000299817891	1641	6.96216	2.86
83015-88-7	ZINC000032180514	1642	6.96031	2.01
464-45-9	ZINC000000967533	1643	6.95845	3.51
60263-06-1	ZINC000001565179	1644	6.9566	2.27
22012-98-2	ZINC000085491596	1645	6.95475	2.61
477-84-9	ZINC000003872206	1646	6.9529	2.29
143601-07-4	ZINC000095909321	1647	6.95105	3.23
135531-75-8	ZINC000248381163	1648	6.94919	2.14
159650-12-1	ZINC000014691668	1649	6.94734	2.79
55497-79-5	ZINC001077995397	1650	6.94549	1.93
101705-37-7	ZINC000005159675	1651	6.94364	1.84
24694-79-9	ZINC001772820189	1653	6.93993	2.71
23132-13-0	ZINC000058594092	1654	6.93808	1.82
20137-37-5	ZINC000064527839	1655	6.93623	3.27
33570-04-6	ZINC000013815747	1656	6.93437	1.51
6902-77-8	ZINC000001681500	1657	6.93252	2.61
197307-49-6	ZINC000096023851	1658	6.93067	3.75
13323-48-3	ZINC000253664645	1659	6.92882	3.05
67567-15-1	ZINC000256497802	1660	6.92696	3.26
1584236-34-9	ZINC000299817755	1661	6.92511	2.38
1020074-97-8	ZINC000096023848	1662	6.92326	2.14
121747-89-5	ZINC000014559467	1663	6.92141	3.18
50597-93-8	ZINC000014560090	1664	6.91956	2.29
1253740-09-8	ZINC000098214404	1665	6.9177	2.94
478-43-3	ZINC000004098704	1666	6.91585	3.1
114542-44-8	ZINC000014780845	1667	6.914	2.84
51005-44-8	ZINC000038139762	1668	6.91215	2.46
464-85-7	ZINC000014684759	1669	6.91029	2.51
1190070-91-7	ZINC000049867504	1670	6.90844	2.99
1246012-26-9	ZINC000100059134	1671	6.90659	2.22
28978-02-1	ZINC000049823152	1672	6.90474	2.54
32885-81-7	ZINC000028875643	1673	6.90288	2.98
219298-74-5	ZINC000095933341	1674	6.90103	2.71
81241-53-4	ZINC000096023809	1675	6.89918	2.72
438536-34-6	ZINC000012153064	1676	6.89733	2.09
10176-71-3	ZINC000013484812	1677	6.89547	2.35
23202-85-9	ZINC000044361247	1678	6.89362	2.6
130288-60-7	ZINC000049872304	1679	6.89177	2.51
191729-44-9	ZINC000255218918	1680	6.88992	3.11
82464-35-5	ZINC000031458984	1681	6.88807	3.12
487-06-9	ZINC000000057754	1682	6.88621	2.72
1092555-02-6	ZINC001077995402	1683	6.88436	2.89
19103-54-9	ZINC000002561268	1684	6.88251	2.12
14144-06-0	ZINC000008214547	1685	6.88066	3.39
24512-63-8	ZINC000003882101	1686	6.8788	3.14
4382-34-7	ZINC000014728182	1687	6.87695	2.75
329975-47-5	ZINC001078028407	1689	6.87325	1.88
526214-79-9	ZINC000013340099	1690	6.87139	2.51
2023822-41-3	ZINC001772820159	1691	6.86954	2.97
118-10-5	ZINC000003881680	1692	6.86769	2.2
138870-96-9	ZINC000013377925	1693	6.86584	2.56
173429-83-9	ZINC000015216035	1694	6.86399	3.09
1264496-61-8	ZINC000096023747	1695	6.86213	2.2
40716-66-3	ZINC000001531550	1696	6.86028	2.34
135383-94-7	ZINC001772820466	1697	6.85843	2.51
20489-11-6	ZINC000013335526	1698	6.85658	3.1
155485-76-0	ZINC000031861484	1699	6.85472	2.46
504-15-4	ZINC000000391826	1700	6.85287	2.23
389572-70-7	ZINC000000258869	1701	6.85102	3.21
65597-42-4	ZINC000013385061	1702	6.84917	2.98
155709-40-3	ZINC000015148442	1703	6.84731	1.78
97856-19-4	ZINC000033877662	1704	6.84546	1.34
38230-99-8	ZINC000936069304	1705	6.84361	2.34
93078-83-2	ZINC000014811056	1706	6.84176	2.95
70051-38-6	ZINC000059589003	1707	6.8399	2.85
159853-36-8	ZINC000014455484	1708	6.83805	2.18
124096-81-7	ZINC000104892608	1709	6.8362	1.47
120681-81-4	ZINC000013482181	1710	6.83435	2.1
18251-36-0	ZINC000139836561	1711	6.8325	2.59
451478-47-0	ZINC001077996683	1712	6.83064	3.27
145033-48-3	ZINC000255261951	1713	6.82879	2.58
331-39-5	ZINC000000058172	1714	6.82694	2.5
1372558-33-2	ZINC001077995392	1715	6.82509	2.8
156338-93-1	ZINC000034176767	1716	6.82323	2.17
87932-34-1	ZINC000008829769	1717	6.82138	2.06
521-32-4	ZINC000003979028	1718	6.81953	2.84
22841-42-5	ZINC000013331154	1719	6.81768	1.29
120330-44-1	ZINC000031155114	1720	6.81582	2.11
60-35-5	ZINC000008034818	1721	6.81397	2.12
529-61-3	ZINC000006524916	1722	6.81212	1.82
849201-84-9	ZINC001079928303	1723	6.81027	2.6
62312-55-4	ZINC000003648018	1724	6.80841	2.36
53587-37-4	ZINC000166512769	1725	6.80656	3.53
2055073-75-9	ZINC001772820212	1726	6.80471	3.24
31076-39-8	ZINC000014647563	1727	6.80286	1.56
97411-50-2	ZINC001077996378	1728	6.80101	1.68
53936-56-4	ZINC000036404734	1729	6.79915	3.44
666250-52-8	ZINC000013340018	1730	6.7973	1.95
155205-64-4	ZINC000038230161	1731	6.79545	2.72
33458-82-1	ZINC000253591192	1732	6.7936	2.23
1372527-39-3	ZINC000084711472	1733	6.79174	2.32
64421-28-9	ZINC000031156436	1734	6.78989	2.66
31685-80-0	ZINC000006067611	1735	6.78804	2.63
19879-32-4	ZINC000015115057	1736	6.78619	2.77
1467083-09-5	ZINC001772820149	1737	6.78433	2.64
28808-62-0	ZINC000000265490	1738	6.78248	1.84
90341-45-0	ZINC000034474300	1739	6.78063	2.82
39262-14-1	ZINC000255210626	1740	6.77878	2.27
1007387-95-2	ZINC000096023882	1741	6.77693	1.79
150150-61-1	ZINC000014452123	1742	6.77507	2.09
224824-74-2	ZINC000033830039	1743	6.77322	2.65
76-66-4	ZINC000004097968	1744	6.77137	3.64
925932-08-7	ZINC000035086286	1745	6.76952	1.83
482-89-3	ZINC000100014196	1746	6.76766	1.75
142937-50-6	ZINC000096023743	1747	6.76581	2.26
16584-54-6	ZINC000006523722	1748	6.76396	3.54
1189801-51-1	ZINC001772820169	1749	6.76211	2.05
6216-81-5	ZINC000029041899	1750	6.76025	2.68
167875-39-0	ZINC000252585412	1751	6.7584	2.48
857297-90-6	ZINC001077996487	1752	6.75655	2.57
50656-77-4	ZINC000015272057	1753	6.7547	2.67
5132-66-1	ZINC000072940742	1754	6.75284	2.64
25577-04-2	ZINC000014822017	1755	6.75099	2.38
712272-88-3	ZINC000014615954	1756	6.74914	2.07
202721-09-3	ZINC000014455009	1757	6.74729	1.82
84567-08-8	ZINC000014922263	1758	6.74544	2.75
143120-46-1	ZINC000044431068	1759	6.74358	2.05
93673-81-5	ZINC000014585198	1760	6.74173	2.63
108885-61-6	ZINC000255220134	1761	6.73988	2.14
112649-48-6	ZINC000014766825	1762	6.73803	3.03
333361-85-6	ZINC000238737395	1763	6.73617	2.35
93-39-0	ZINC000001559620	1764	6.73432	2.88
1445952-33-9	ZINC000220309589	1765	6.73247	3.28
111917-59-0	ZINC000005853927	1766	6.73062	2.93
33954-34-6	ZINC000055753309	1767	6.72876	2.75
57-87-4	ZINC000004084618	1768	6.72691	2.35
1207861-69-5	ZINC001772820230	1769	6.72506	2.05
77988-07-9	ZINC000031457890	1770	6.72321	3.03
458-37-7	ZINC000000899824	1771	6.72135	1.7
2172624-67-6	ZINC001772820223	1772	6.7195	2.69
102919-76-6	ZINC000043721717	1773	6.71765	2.35
34020-07-0	ZINC000004102218	1774	6.7158	2.45
1613152-34-3	ZINC000225452336	1775	6.71395	2.49
110623-73-9	ZINC000169721177	1776	6.71209	3.23
332371-82-1	ZINC000039084983	1777	6.71024	2.45
80510-06-1	ZINC000085826837	1778	6.70839	1.96
149180-48-3	ZINC000247973562	1779	6.70654	3.02
49679-20-1	ZINC000014612174	1780	6.70468	2.07
18194-29-1	ZINC000014696115	1781	6.70283	2.47
771493-42-6	ZINC000085841965	1782	6.70098	2.24
4429-63-4	ZINC000056871302	1783	6.69913	2.58
18326-06-2	ZINC000207633983	1784	6.69727	2.39
25645-19-6	ZINC000253683698	1785	6.69542	2.04
145400-03-9	ZINC000014618423	1786	6.69357	2.18
1585-68-8	ZINC000013384148	1787	6.69172	2
55610-01-0	ZINC000001632198	1788	6.68987	2.54
33390-41-9	ZINC000005849312	1789	6.68801	2.72
476-28-8	ZINC000003881372	1791	6.68431	2.96
1392213-93-2	ZINC000102165645	1792	6.68246	2.6
133360-51-7	ZINC000252585089	1793	6.6806	3.26
130395-54-9	ZINC001772820497	1794	6.67875	2.91
27770-13-4	ZINC000006485079	1795	6.6769	2.84
269742-39-4	ZINC001772820409	1796	6.67505	3.42
69844-32-2	ZINC000005922055	1797	6.67319	1.74
84375-46-2	ZINC000085643885	1798	6.67134	2.1
874303-33-0	ZINC000014727607	1799	6.66949	2.75
165459-53-0	ZINC000257559118	1800	6.66764	2.33
124598-11-4	ZINC000014593822	1801	6.66578	2.01
24694-80-2	ZINC000936069302	1802	6.66393	2.51
51-34-3	ZINC000100037020	1803	6.66208	2.78
136083-93-7	ZINC000003782686	1804	6.66023	2.11
150148-81-5	ZINC000042922807	1805	6.65838	3.1
21302-79-4	ZINC000253501071	1806	6.65652	1.95
1372527-39-3	ZINC000084711473	1807	6.65467	3.08
210108-90-0	ZINC001772820245	1808	6.65282	2.78
578-86-9	ZINC000000985403	1809	6.65097	2.87
213905-35-2	ZINC000014616230	1810	6.64911	2.21
34157-83-0	ZINC000019795938	1811	6.64726	2.3
26833-87-4	ZINC000095599165	1812	6.64541	2.23
64480-66-6	ZINC000013542524	1813	6.64356	2.29
37239-47-7	ZINC000257520562	1814	6.6417	2.25
1313434-74-0	ZINC000247919337	1815	6.63985	2.04
25514-31-2	ZINC000261502699	1816	6.638	2
219916-77-5	ZINC000255284857	1817	6.63615	3.36
305364-91-4	ZINC000013400255	1818	6.63429	2.64
104777-68-6	ZINC000008234348	1819	6.63244	2.33
119188-37-3	ZINC000034645557	1820	6.63059	2.71
76035-62-6	ZINC000038842195	1821	6.62874	2.25
1417805-17-4	ZINC000095586882	1822	6.62689	2.81
77658-38-9	ZINC000014486013	1823	6.62503	1.96
509-24-0	ZINC000028538801	1824	6.62318	2.04
34366-34-2	ZINC000005567799	1825	6.62133	2.17
1978388-55-4	ZINC001772576980	1826	6.61948	2.63
1206734-95-3	ZINC000071316154	1827	6.61762	2.12
1220891-22-4	ZINC000077031623	1828	6.61577	2.43
55306-03-1	ZINC000038139809	1829	6.61392	2.2
82958-45-0	ZINC000238758482	1830	6.61207	2.71
100665-43-8	ZINC000261119120	1831	6.61021	2.05
1361-18-8	ZINC001772820518	1832	6.60836	1.94
57361-74-7	ZINC000238751968	1833	6.60651	2.59
16566-88-4	ZINC000004175510	1834	6.60466	2.33
67920-48-3	ZINC000015043977	1835	6.6028	1.83
1309478-07-6	ZINC000105955657	1836	6.60095	2.62
516-37-0	ZINC000043620416	1837	6.5991	2.79
1206788-61-5	ZINC000064503465	1838	6.59725	2.94
18296-45-2	ZINC000031164228	1839	6.5954	2.97
78454-17-8	ZINC000095546329	1840	6.59354	2.65
52286-59-6	ZINC000252448790	1841	6.59169	2.12
28590-40-1	ZINC000002030715	1842	6.58984	3.35
262272-76-4	ZINC001772820225	1844	6.58613	2.56
76267-48-6	ZINC000196281423	1845	6.58428	2.95
151135-64-7	ZINC000004311891	1846	6.58243	2.82
122855-49-6	ZINC000014722465	1847	6.58058	2.99
67-47-0	ZINC000000900788	1848	6.57872	2.02
64929-59-5	ZINC000096023800	1849	6.57687	2.4
50656-77-4	ZINC000015272052	1850	6.57502	2.02
61854-36-2	ZINC000014775976	1851	6.57317	2.08
256445-68-8	ZINC000040934587	1852	6.57132	2.3
218780-16-6	ZINC000014449555	1853	6.56946	2.7
872729-33-4	ZINC000086038721	1854	6.56761	1.99
126-19-2	ZINC000008218968	1855	6.56576	1.8
163391-76-2	ZINC000043509655	1856	6.56391	1.08
20482-21-7	ZINC001077996766	1857	6.56205	2.79
121064-78-6	ZINC000049746442	1858	6.5602	1.84
10351-88-9	ZINC000004098857	1859	6.55835	3.18
18110-87-7	ZINC000013482860	1860	6.5565	2.55
62596-34-3	ZINC000014951196	1861	6.55464	3.31
953427-66-2	ZINC000238754719	1862	6.55279	2.21
221466-41-7	ZINC001077996643	1863	6.55094	2.27
1245-00-7	ZINC000014710237	1864	6.54909	2.03
1246012-27-0	ZINC001772820063	1865	6.54723	3.48
79886-50-3	ZINC000085540908	1866	6.54538	3.18
1411629-26-9	ZINC000936069310	1867	6.54353	2.15
27003-73-2	ZINC000004098820	1868	6.54168	2.33
70868-78-9	ZINC000067902737	1869	6.53983	2.65
65428-13-9	ZINC000005854607	1870	6.53797	2.93
96801-92-2	ZINC000035464389	1871	6.53612	3.01
1639810-67-5	ZINC000299817396	1872	6.53427	2.74
577976-26-2	ZINC000087493009	1873	6.53242	2.55
25514-29-8	ZINC001772820510	1874	6.53056	3.15
125124-68-7	ZINC000095913937	1875	6.52871	1.35
56038-13-2	ZINC000004654665	1876	6.52686	2.73
73166-28-6	ZINC000001588038	1877	6.52501	2.29
1254-85-9	ZINC000019795890	1878	6.52315	2.5
94344-54-4	ZINC000005999049	1879	6.5213	2.09
149155-19-1	ZINC000038143594	1880	6.51945	2.23
117333-12-7	ZINC000013449668	1881	6.5176	2.31
180164-14-1	ZINC000086031671	1882	6.51574	1.81
549-84-8	ZINC000008830584	1883	6.51389	2.4
1014974-98-1	ZINC000049775399	1884	6.51204	2.2
264234-05-1	ZINC000013829481	1885	6.51019	2.7
128988-55-6	ZINC000261492859	1886	6.50834	3.08
1372527-25-7	ZINC000084709280	1887	6.50648	2.31
156640-23-2	ZINC000014821891	1888	6.50463	2.89
464-43-7	ZINC000000968100	1889	6.50278	2.73
1390-72-3	ZINC000006092732	1890	6.50093	2.87
491-67-8	ZINC000003871633	1891	6.49907	2.46
124096-81-7	ZINC001082884049	1892	6.49722	2.46
51095-47-7	ZINC000002572675	1893	6.49537	2.6
541-15-1	ZINC000003079340	1894	6.49352	2.54
471-80-7	ZINC000006491272	1895	6.49166	1.89
117421-22-4	ZINC000214550746	1896	6.48981	1.52
111-20-6	ZINC000001531045	1897	6.48796	2.74
188894-19-1	ZINC000257704797	1898	6.48611	2.98
87530-30-1	ZINC000000899126	1899	6.48426	2.32
122537-60-4	ZINC001772820248	1900	6.4824	3.28
36062-05-2	ZINC000013377888	1901	6.48055	2.35
252351-95-4	ZINC000033818836	1902	6.4787	2.6
146900-55-2	ZINC000001856356	1903	6.47685	2.83
617722-56-2	ZINC000014883242	1904	6.47499	2.67
26652-12-0	ZINC000040881068	1905	6.47314	2.67
117421-22-4	ZINC000214550586	1906	6.47129	3.29
4046-02-0	ZINC000000160496	1907	6.46944	3.06
113122-54-6	ZINC000013481926	1908	6.46758	4.43
522-11-2	ZINC000000035527	1909	6.46573	2.75
2111-46-8	ZINC001772820235	1910	6.46388	3.04
99132-99-7	ZINC001772820459	1911	6.46203	2.21
129350-09-0	ZINC000005158595	1912	6.46017	2.29
19013-07-1	ZINC000005167610	1913	6.45832	3.31
945619-74-9	ZINC000238808913	1914	6.45647	2.69
123135-05-7	ZINC000042875583	1915	6.45462	2.37
99132-95-3	ZINC001772820479	1917	6.45091	1.41
77658-46-9	ZINC000252498835	1918	6.44906	2.59
51014-29-0	ZINC000033754036	1919	6.44721	1.78
4657-58-3	ZINC000256415687	1920	6.44536	2.68
518-34-3	ZINC000028116057	1921	6.4435	2.91
178765-54-3	ZINC000038956224	1922	6.44165	2.08
4846-19-9	ZINC000029321809	1923	6.4398	2.8
103001-05-4	ZINC000013434357	1924	6.43795	2.99
482-01-9	ZINC000000899848	1925	6.43609	3.21
124168-04-3	ZINC001772820199	1926	6.43424	2.83
93767-25-0	ZINC000095619883	1927	6.43239	2.25
76248-63-0	ZINC001772820181	1928	6.43054	3.17
5451-67-2	ZINC000001583987	1929	6.42868	2.47
56755-22-7	ZINC000013660064	1930	6.42683	2.39
529-44-2	ZINC000003874317	1931	6.42498	2.09
37831-70-2	ZINC000000895662	1932	6.42313	1.62
5508-58-7	ZINC000003881797	1933	6.42128	2.48
1422506-51-1	ZINC001077996768	1934	6.41942	2.71
548-19-6	ZINC000003197535	1935	6.41757	3
86831-53-0	ZINC000014686472	1936	6.41572	2.46
82513-70-0	ZINC001077996716	1937	6.41387	2.02
179388-53-5	ZINC000086022970	1938	6.41201	3.32
103917-26-6	ZINC000096023756	1939	6.41016	2.39
126716-34-5	ZINC000005854502	1940	6.40831	2.21
28449-62-9	ZINC000012153646	1941	6.40646	2.56
10391-09-0	ZINC000257617435	1942	6.4046	2.35
198827-23-5	ZINC000014646862	1943	6.40275	2.5
20175-84-2	ZINC000000899329	1944	6.4009	3.25
2571-22-4	ZINC000004098201	1945	6.39905	2.28
480-47-7	ZINC000000899139	1946	6.3972	2.84
446-71-9	ZINC000004098322	1947	6.39534	3.51
62356-47-2	ZINC000002146356	1948	6.39349	2.48
4407-36-7	ZINC000001529427	1949	6.39164	2.46
106894-43-3	ZINC000253485417	1950	6.38979	2.25
18456-02-5	ZINC001772820273	1951	6.38793	2.66
24352-51-0	ZINC000085221723	1952	6.38608	2.29
85734-02-7	ZINC000015216511	1953	6.38423	2.57
105330-59-4	ZINC000014642997	1954	6.38238	2.4
30273-62-2	ZINC000002003946	1955	6.38052	2.39
22255-22-7	ZINC000013456778	1956	6.37867	2.39
98751-77-0	ZINC000038927675	1957	6.37682	2.14
1514669-21-6	ZINC001772820145	1958	6.37497	2.8
340702-68-3	ZINC000150352315	1959	6.37311	1.75
85372-72-1	ZINC001077997731	1960	6.37126	2.76
1083195-05-4	ZINC000031168439	1961	6.36941	2.63
78012-28-9	ZINC000096085750	1962	6.36756	2.89
52286-59-6	ZINC000242620164	1963	6.36571	2.94
20633-67-4	ZINC000033831794	1964	6.36385	3.58
141947-42-4	ZINC000044431492	1965	6.362	2.81
15291-76-6	ZINC000100062020	1966	6.36015	1.78
64421-28-9	ZINC000098043719	1967	6.3583	1.74
155683-00-4	ZINC000253387908	1968	6.35644	3.4
61671-56-5	ZINC001077995409	1969	6.35459	2.32
5631-68-5	ZINC000000388556	1970	6.35274	2.65
16100-84-8	ZINC001077996744	1971	6.35089	2.71
883872-71-7	ZINC000254153398	1972	6.34903	2.75
98665-65-7	ZINC001772820187	1973	6.34718	2.9
514-39-6	ZINC000004023037	1974	6.34533	1.84
164661-12-5	ZINC000087493007	1975	6.34348	3
1522004-68-7	ZINC000208937772	1976	6.34162	2.15
2055882-23-8	ZINC001772820231	1977	6.33977	2.84
49624-66-0	ZINC000104532454	1978	6.33792	2.24
61303-13-7	ZINC000049898792	1979	6.33607	1.85
1667718-89-9	ZINC001772820279	1980	6.33422	2.46
117469-56-4	ZINC000014679547	1981	6.33236	2.79
300-08-3	ZINC000052541469	1982	6.33051	2.26
52766-70-8	ZINC000015657754	1983	6.32866	2.36
929881-46-9	ZINC000014813367	1984	6.32681	2.36
116782-73-1	ZINC000255202042	1985	6.32495	1.78
168254-95-3	ZINC001772820155	1986	6.3231	1.5
5945-86-8	ZINC000008382508	1987	6.32125	1.97
20133-19-1	ZINC000034173921	1988	6.3194	2.8
1403984-03-1	ZINC000200064353	1989	6.31754	2.59
83170-31-4	ZINC000095786149	1990	6.31569	2.7
104669-02-5	ZINC000006092746	1991	6.31384	2.63
260413-62-5	ZINC000169724085	1992	6.31199	2.27
62949-93-3	ZINC000013125764	1993	6.31013	3.24
58-63-9	ZINC000008855117	1994	6.30828	3.02
1134138-66-1	ZINC001772820294	1995	6.30643	2.34
78510-19-7	ZINC000005999086	1996	6.30458	2.82
84-69-5	ZINC000000388318	1997	6.30273	2.72
6899-73-6	ZINC000004995168	1998	6.30087	2.81
67256-05-7	ZINC000085493565	1999	6.29902	2.08
100234-59-1	ZINC000015118729	2000	6.29717	2.77
514-62-5	ZINC000004097893	2001	6.29532	3.08
115783-35-2	ZINC000096023714	2002	6.29346	3.56
4651-46-1	ZINC000033986103	2003	6.29161	1.85
641-38-3	ZINC000000402623	2004	6.28976	3.19
53538-13-9	ZINC000040874044	2005	6.28791	2.8
132951-90-7	ZINC000028882413	2006	6.28605	3.3
63968-64-9	ZINC000008143788	2007	6.2842	1.44
79082-64-7	ZINC000030726823	2008	6.28235	3.22
476-66-4	ZINC000003872446	2009	6.2805	2.44
30508-27-1	ZINC000005854565	2010	6.27865	2.62
112503-87-4	ZINC000014655555	2011	6.27679	2.68
168037-22-7	ZINC000096095464	2012	6.27494	2.46
175862-40-5	ZINC001772820482	2013	6.27309	2.71
4707-33-9	ZINC000001628348	2014	6.27124	3.16
22255-07-8	ZINC001077995389	2015	6.26938	3.43
1207181-61-0	ZINC000096023698	2016	6.26753	2.24
877875-96-2	ZINC000095639151	2017	6.26568	2.75
[truncated: 1,745 more rows]
